# Supplementary material for: The Nonphysiological Reductant Sodium Dithionite and [FeFe] Hydrogenase: Influence on the Enzyme Mechanism
Source: PubMed Central journal article supplement (PMC8569811; doi:10.1021/jacs.1c07322), 2021-10-20
Supplement: ja1c07322_si_001.pdf [file ja1c07322_si_001.pdf]

# Supporting Information

## The non-physiological reductant sodium dithionite and [FeFe] hydrogenase: influence on the enzyme mechanism

Maria Alessandra Martini<sup>1</sup>, Olaf Rüdiger<sup>1</sup>, Nina Breuer<sup>1</sup>, Birgit Nöring<sup>1</sup>, Serena DeBeer<sup>1</sup>,  
Patricia Rodríguez-Maciá<sup>2\*</sup>, James A. Birrell<sup>1\*</sup>

<sup>1</sup>Department of Inorganic Spectroscopy, Max Planck Institute for Chemical Energy Conversion, Stiftstraße 34-36, 45470 Mülheim an der Ruhr, Germany

<sup>2</sup>Current address: Inorganic Chemistry Laboratory, Department of Chemistry, University of Oxford, South Parks Road, Oxford, OX1 3QR, UK

### Corresponding Author

\*james.birrell@cec.mpg.de

\*patricia.rodriguezmacia@chem.ox.ac.uk

### Contents

#### Experimental Section

#### Supplementary Discussion: Origins of H<sub>ox</sub>H and H<sub>red</sub>'H

Table S1 | IR bands in [FeFe] hydrogenase states observed in this study

Table S2 | Comparison of IR bands in [FeFe] hydrogenase in the H<sub>ox</sub> vs H<sub>ox</sub>-DT<sub>i</sub> and H<sub>hyd-red</sub> vs H<sub>hyd</sub> states

Table S3 | Parameters used for pseudo-Voigt fitting

Figure S1 | Effect of oxNaDT on CrHydA1<sup>ADT</sup> at pH 7

Figure S2 | Effect of Na<sub>2</sub>SO<sub>4</sub> and Na<sub>2</sub>S<sub>2</sub>O<sub>3</sub> on CrHydA1<sup>ADT</sup>

Figure S3 | Formation of the H<sub>ox</sub>H state in DdHydAB and CpHydA1 with Na<sub>2</sub>SO<sub>3</sub> and low pH

Figure S4 | Full titration of CrHydA1<sup>PDT</sup> with Na<sub>2</sub>SO<sub>3</sub> at pH 6 and pH 7 under N<sub>2</sub>

Figure S5 | Titration of CrHydA1<sup>PDT</sup> with Na<sub>2</sub>SO<sub>3</sub> at pH 4 and pH 5 under N<sub>2</sub>

Figure S6 | Titration curves of CrHydA1<sup>PDT</sup>

Figure S7 | Speciation of SO<sub>3</sub><sup>2-</sup> as a function of pH monitored by IR spectroscopy

Figure S8 | Full titration of CrHydA1<sup>PDT</sup> with Na<sub>2</sub>SO<sub>3</sub> under 2% H<sub>2</sub> at pH 6

Figure S9 | Full titration of CrHydA1<sup>PDT</sup> with Na<sub>2</sub>SO<sub>3</sub> under 2% H<sub>2</sub> at pH 7

Figure S10 | Full titration of CrHydA1<sup>PDT</sup> with Na<sub>2</sub>SO<sub>3</sub> under 2% H<sub>2</sub> at pH 8 and pH 5

Figure S11 | Calculation of the redox potential of H<sub>ox</sub>/H<sub>red</sub> and H<sub>ox</sub>H/H<sub>red</sub>'H

Figure S12 | Formation of the H<sub>ox</sub>H-CO state

Figure S13 | Cyclic voltammetry of DdHydAB in the presence of Na<sub>2</sub>SO<sub>3</sub>

Figure S14 | Cyclic voltammetry of Na<sub>2</sub>SO<sub>3</sub> at various pH values

Figure S15 | Cyclic voltammetry of DdHydAB at various pH values

**Figure S16 | Cyclic voltammetry of *DdHydAB* at various pH values in the presence of  $\text{Na}_2\text{SO}_3$**

**Figure S17 | Chronoamperometry experiments of *DdHydAB* in the absence of  $\text{Na}_2\text{SO}_3$**

**Supplementary Discussion: pH dependent redox potentials**

**Figure S18 | Model for pH dependent redox potential titrations of *CrHydA1*<sup>PDT</sup>**

## Experimental Section

### Protein production

Sodium dithionite (NaDT) was excluded from all protein preparations to avoid contamination by its oxidation products. *CrHydA1*, *DdHydAB* and *CpHydA1* were recombinantly produced in *E. coli* as apo-proteins (lacking the [2Fe]<sub>H</sub> subcluster). Samples were then artificially matured with the [2Fe]<sub>H</sub> precursor (Et<sub>4</sub>N)<sub>2</sub>[Fe<sub>2</sub>(ADT)(CO)<sub>4</sub>(CN)<sub>2</sub>] (using a <sup>57</sup>Fe-labeled version for NRVS experiments) or (Et<sub>4</sub>N)<sub>2</sub>[Fe<sub>2</sub>(PDT)(CO)<sub>4</sub>(CN)<sub>2</sub>], as previously described<sup>1-3</sup>. (Et<sub>4</sub>N)<sub>2</sub>[Fe<sub>2</sub>(ADT)(CO)<sub>4</sub>(CN)<sub>2</sub>] and (Et<sub>4</sub>N)<sub>2</sub>[Fe<sub>2</sub>(ADT)(CO)<sub>4</sub>(CN)<sub>2</sub>] were prepared as previously described<sup>4,5</sup>.

### Sample preparation for FTIR Spectroscopy

Concentrated (2-5 mM) protein samples (in 25 mM Tris-HCl, 25 mM KCl, pH 8) were diluted (1 μL in 12 μL total volume) in 20 mM Na-acetate, 20 mM MES, 20 mM HEPES, 20 mM Tris, 20 mM glycine buffer (20 mM mixed buffer) adjusted to the desired pH with NaOH or HCl. Na<sub>2</sub>SO<sub>3</sub>, Na<sub>2</sub>SO<sub>4</sub>, Na<sub>2</sub>S<sub>2</sub>O<sub>3</sub> (all prepared in 20 mM mixed buffer) or oxidized NaDT (oxNaDT, prepared in water) were added at various concentrations (by substituting a fraction of the total 12 μL volume of the FTIR sample with a given volume of stock solution) as specified for each experiment. All solutions, except oxNaDT for some experiments where stated, were pH corrected before use. The solution of oxNaDT was prepared under aerobic conditions using fresh NaDT (1 M) and was left stirring at room temperature for 2 h under atmospheric oxygen to fully oxidize the dithionite anion. Before being added to the protein samples, the solution was degassed and moved into an anaerobic glovebox filled with N<sub>2</sub>. To prepare *CrHydA1* in the H<sub>ox</sub>-CO and H<sub>ox</sub>H-CO states, samples (with or without Na<sub>2</sub>SO<sub>3</sub>) were flushed with 100% CO gas for 10 min before being loaded into the FTIR cell. For all Na<sub>2</sub>SO<sub>3</sub> solutions, 1 M stock solutions were prepared in 20 mM mixed buffer, aerobically, and adjusted to the desired pH.

### FTIR Spectroscopy

FTIR spectra were measured using a Bruker Vertex 80v FTIR spectrometer equipped with a mercury cadmium telluride detector cooled by liquid nitrogen. Spectra were recorded in the double-sided, forward-backward mode, with a resolution of 2 cm<sup>-1</sup>, an aperture setting of 3 mm and scan velocity of 20 kHz. Spectra are the average of 100 scans. Samples (12 μL) were sealed between CaF<sub>2</sub> windows (20 mm x 4 mm, Korth Kristalle, Altenholz) separated by a 50 μm Teflon spacer coated with vacuum grease and closed in a homebuilt IR cell with rubber rings. FTIR data were processed using home-written routines in the MATLAB environment. For *CrHydA1*<sup>PDT</sup> prepared under 2% H<sub>2</sub>, the region between 1955–1920 cm<sup>-1</sup> (corresponding to the terminal CO on Fe<sub>d</sub>) in each spectrum was fitted with pseudo-Voigt functions using QSoas 3.0 (ref <sup>6</sup>) to identify the individual contributions from the H<sub>ox</sub>, H<sub>red</sub>, H<sub>ox</sub>H and H<sub>red</sub>'H states to the FTIR absorbance. Fit parameters (Table S3) were obtained for H<sub>ox</sub> and H<sub>red</sub> from spectra in the absence of Na<sub>2</sub>SO<sub>3</sub>. Parameters for H<sub>ox</sub>H and H<sub>red</sub>'H were obtained from the analysis of spectra at low pH and high Na<sub>2</sub>SO<sub>3</sub> concentrations, where these were the dominant states, and by fixing the already determined parameters for H<sub>ox</sub> and H<sub>red</sub>. Fit parameters for the four states were then fixed in all subsequent fits (Table S3), allowing only the peak intensity to vary. Good agreement between simulated and experimental data was obtained for all spectra.

### NRVS

NRVS spectra for [2<sup>57</sup>Fe]<sub>H</sub>-*CrHydA1* in 20 mM mixed buffer pH 6, with or without 1 M Na<sub>2</sub>SO<sub>3</sub>, were recorded at P01, PETRA-III, Hamburg.<sup>7</sup> The operation of the storage ring was a 40-bunch mode (bunch separation of 192 ns) with a beam energy of 6 GeV. The experimental setup established at the beamline including a two-step monochromatization (energy resolution of ~ 1 meV) and detection by avalanche photo diodes was used.<sup>7</sup> Samples, in home-built copper samples holders, were positioned in the beam on the top of a closed cycle helium cryostat with a copper cold finger, using a home-built copper adapter. The sample was then covered with a mylar cylinder and a metal cover with a beryllium window. The temperature at the

base of the sample was maintained at 10 K and the Stokes/anti-Stokes imbalance derived real sample temperatures were 10–20 K. The NIS data were collected during several scans within the energy range of –20 to 100 meV with a 0.25 meV step size and a measuring time of 5 s per energy step. Data were collected as the raw nuclear inelastic scattering (NIS) counts. Calculation of partial density of vibrational states (PVDOS) was performed using routines written in Python with a binning of 0.5 meV.

### **Electrochemistry**

*DdHydAB* was covalently attached to a pyrolytic graphite electrode (0.031 cm<sup>2</sup>, homemade using pyrolytic graphite from Momentive Materials) modified with 4-nitrobenzenediazonium salt as described previously.<sup>8</sup> Once modified, the electrode was moved inside a glovebox filled with N<sub>2</sub> and subjected to 10 cycles of voltammetry from +0.241 to –0.659 V to remove oxygen adsorbed on the electrode surface. *DdHydAB* was immobilized by covering the electrode with 6 μL of protein solution (10 μM in 10 mM MES pH 5.8). The protein was left to adsorb for 20 min. Subsequently, N-hydroxysuccinimide (NHS, 4.5 μL of 128 mM solution) and N-(3-dimethylaminopropyl)-N'-ethylcarbodiimide (EDC, 5.5 μL of 210 mM solution), both dissolved in 10 mM MES pH 5.8, were added to the electrode and left to react for 90 min. The electrode was rinsed with water and then in the appropriate experimental buffer by rotating the electrode inside the buffer solution for 1 min. Electrochemical measurements were performed in a standard three-electrode electrochemical cell with a platinum wire as counter electrode and a saturated calomel reference electrode, separated from the main compartment in a sidearm containing 0.1 M KCl, connected to the main cell compartment by a Luggin capillary. The reference electrode potential was calibrated using (hydroxymethyl)ferrocene (+436 mV vs SHE) as a reference.<sup>9</sup> The potential was controlled by a VersaSTAT 4–400 potentiostat. A set of mass flow-controllers was used to control the composition of the gas flushed through the electrochemical cell. A cell temperature of 25 °C was maintained by a waterjacket system and a water circulator. All the experiments were performed in 20 mM mixed buffer at the desired pH with addition of 0.1 M NaCl. All potentials are quoted versus the standard hydrogen electrode (SHE).

## Supplementary Discussion: Origins of $H_{ox}H$ and $H_{red}'H$

As mentioned in the main text, the  $H_{ox}H$  and  $H_{red}'H$  states in Model 2 have been reported to accumulate at low pH in the presence of sodium dithionite (NaDT) and were proposed to be protonated versions of  $H_{ox}$  and  $H_{red}'$ , respectively, based on density functional theory (DFT) calculations.<sup>10, 11</sup>  $H_{ox}H$ , originally identified during studies of the  $H_{hyd}$  state, exhibits an infrared (IR) spectrum similar to that of  $H_{ox}$ , but with vibrational frequencies shifted higher in energy by 4-6  $cm^{-1}$  (Table S1).<sup>12</sup> Stripp and coworkers suggested that the  $H_{ox}H$  state is protonated on the sulfur of one of the cysteine residues ligating  $[4Fe-4S]_H$ ,<sup>11</sup> the same cysteine proposed to be protonated in  $H_{red}'$ ,<sup>10</sup> which in Model 2 forms from  $H_{ox}$  via PCET at  $[4Fe-4S]_H$ . This protonation is thought to have a regulatory effect on catalysis, preventing the formation of the low-activity reduced states containing a  $\mu H^-$ .<sup>13-15</sup> Recently, the presence of a  $\mu H^-$  in the  $H_{red}H^+$  and  $H_{sred}H^+$  states has been disputed,<sup>16-18</sup> and the redox potential of  $[4Fe-4S]_H$  has been shown to be pH independent,<sup>19</sup> challenging the proposed PCET at  $[4Fe-4S]_H$  in the formation of  $H_{red}'$ .

As the reductant NaDT is needed for the formation of  $H_{ox}H$ , this state was proposed to lie at the end of the catalytic cycle: after  $H_{red}'$  and  $H_{hyd}$ , where the proton on  $[4Fe-4S]_H$  is retained. Deprotonation of  $H_{ox}H$ , which would reform  $H_{ox}$ , is hindered at low pH, potentially explaining why this state accumulates under acidic conditions. However, it is unclear why the  $H_{ox}$  state does not simply convert to  $H_{ox}H$  at low pH. The  $H_{red}'H$  state was reported to form upon reduction and protonation of  $H_{ox}H$ , under  $H_2$  or via electrochemical reduction, but again only in the presence of NaDT at low pH.<sup>10, 11</sup> Similar to  $H_{ox}$  vs  $H_{ox}H$ , the infrared spectrum of  $H_{red}'H$  resembles the one of  $H_{red}'$ , but with bands shifted to slightly higher energies (Table S1). DFT calculations suggested that, in  $H_{red}'H$ , a second proton, in addition to the one proposed to be already bound in  $H_{ox}H$  and  $H_{red}'$ , binds to another cysteine residue ligating the  $[4Fe-4S]_H$  subcluster. Whether  $H_{red}'H$  is an intermediate of the catalytic cycle was not clarified. Importantly, both  $H_{ox}H$  and  $H_{red}'H$  have not been reported to form with chemical reducing agents other than NaDT, including  $H_2$ , or via electrochemical reduction in the absence of NaDT. A satisfactory explanation for this behavior is still lacking.

## Supplementary Tables

Table S1 – IR bands in [FeFe] hydrogenase states observed in this and previous studies

| Enzyme                                 | State <sup>#</sup>                     | CN <sub>p</sub> | CN <sub>d</sub> | CO <sub>p</sub> | CO <sub>d</sub> | CO <sub>b</sub>   | Ref.              |
|----------------------------------------|----------------------------------------|-----------------|-----------------|-----------------|-----------------|-------------------|-------------------|
| <i>CrHydA1</i> <sup>ADT</sup>          | H <sub>ox</sub>                        | 2089            | 2072            | 1964            | 1940            | 1804              | Here              |
|                                        |                                        | 2088            | 2072            | 1964            | 1940            | 1802              | Ref <sup>11</sup> |
|                                        | H <sub>ox</sub> H                      | 2092            | 2076            | 1971            | 1947            | 1813              | Here              |
|                                        |                                        | 2092            | 2076            | 1971            | 1946            | 1812              | Ref <sup>11</sup> |
|                                        | H <sub>red</sub><br>H <sub>red</sub> ' | 2084            | 2067            | 1962            | 1933            | 1793              | Here              |
|                                        |                                        | 2084            | 2066            | 1962            | 1933            | 1792              | Ref <sup>11</sup> |
| H <sub>red</sub> 'H                    | 2086                                   | 2068            | 1966            | 1938            | 1800            | Ref <sup>11</sup> |                   |
| H <sub>ox</sub> -CO                    | 2092                                   | 2082            | 1964            | 2013/1969*      | 1810            | Here              |                   |
|                                        | 2091                                   | 2081            | 1962            | 2012/1968*      | 1808            | Ref <sup>11</sup> |                   |
| H <sub>ox</sub> H-CO                   | 2094                                   | 2086            | 1966            | 2006/1972*      | 1816            | Here              |                   |
|                                        | 2094                                   | 2086            | 1966            | 2006/1972*      | 1816            | Ref <sup>11</sup> |                   |
| <i>CrHydA1</i> <sup>PDT</sup>          | H <sub>ox</sub>                        | 2090            | 2073            | 1966            | 1942            | 1811              | Here              |
|                                        |                                        | 2090            | 2073            | 1965            | 1941            | 1810              | Ref <sup>11</sup> |
|                                        | H <sub>ox</sub> H                      | 2091            | 2075            | 1970            | 1946            | 1813              | Here              |
|                                        |                                        | 2090            | 2075            | 1969            | 1945            | 1814              | Ref <sup>11</sup> |
| H <sub>red</sub><br>H <sub>red</sub> ' | 2085                                   | 2066            | 1964            | 1935            | 1799            | Here              |                   |
|                                        | 2084                                   | 2066            | 1963            | 1934            | 1798            | Ref <sup>11</sup> |                   |
| H <sub>red</sub> 'H                    | 2084                                   | 2068            | 1966            | 1939            | 1802            | Here              |                   |
|                                        | 2084                                   | 2068            | 1966            | 1938            | 1802            | Ref <sup>11</sup> |                   |
| <i>DdHydAB</i> <sup>ADT</sup>          | H <sub>ox</sub>                        | 2087            | 2078            | 1965            | 1940            | 1802              | Here              |
|                                        |                                        | 2090            | 2078            | 1965            | 1940            | 1802              | Ref <sup>11</sup> |
| H <sub>ox</sub> H                      | 2096                                   | 2082            | 1972            | 1947            | 1811            | Here              |                   |
|                                        | 2098                                   | 2083            | 1972            | 1947            | 1812            | Ref <sup>11</sup> |                   |
| <i>CpHydA1</i> <sup>ADT</sup>          | H <sub>ox</sub>                        | 2082            | 2070            | 1970            | 1947            | 1801              | Here              |
|                                        |                                        | 2081            | 2069            | 1970            | 1947            | 1801              | Ref <sup>11</sup> |
| H <sub>ox</sub> H                      | 2084                                   | 2073            | 1975            | 1953            | 1810            | Here              |                   |
|                                        | 2085                                   | 2074            | 1975            | 1953            | 1808            | Ref <sup>11</sup> |                   |

# when two nomenclatures are given, the one underneath is from Stripp and Haumann<sup>20</sup>

\*In the H<sub>ox</sub>-CO and H<sub>ox</sub>H-CO states the two CO ligands bound to Fe<sub>d</sub> are strongly vibrationally coupled giving rise to a higher energy symmetric stretching band and a lower energy antisymmetric stretching band.

Table S2 – Comparison of IR bands in [FeFe] hydrogenase in the H<sub>ox</sub> vs H<sub>ox</sub>-DT<sub>i</sub> and H<sub>hyd:red</sub> vs H<sub>hyd</sub> states

| Enzyme                        | State                            | CN <sub>p</sub> | CN <sub>d</sub> | CO <sub>p</sub> | CO <sub>d</sub> | CO <sub>b</sub>   | Ref.              |
|-------------------------------|----------------------------------|-----------------|-----------------|-----------------|-----------------|-------------------|-------------------|
| <i>CrHydA1</i> <sup>ADT</sup> | H <sub>ox</sub>                  | 2089            | 2072            | 1964            | 1940            | 1804(2)           | Here              |
|                               |                                  | 2088            | 2072            | 1964            | 1940            | 1802              | Ref <sup>11</sup> |
|                               | H <sub>ox</sub> -DT <sub>i</sub> | 2092            | 2076            | 1971            | 1947            | 1813              | Here              |
|                               |                                  | 2092            | 2074            | 1970            | 1946            | 1812              | Ref <sup>11</sup> |
|                               | H <sub>hyd:ox</sub>              | 2092            | 2086            | 1983            | 1954            | 1865              | Ref <sup>18</sup> |
| H <sub>hyd:red</sub>          | 2087                             | 2078            | 1972            | 1954            | 1851            | Ref <sup>18</sup> |                   |
| H <sub>hyd</sub>              | 2088                             | 2076            | 1980            | 1960            | 1860            | Ref <sup>12</sup> |                   |

**Table S3 – Parameters used for Pseudo-Voigt fitting**

| <b>Pseudo-Voigt fitting parameters</b> |                      |                      |                      |
|----------------------------------------|----------------------|----------------------|----------------------|
| <b>State</b>                           | <b>x<sub>i</sub></b> | <b>w<sub>i</sub></b> | <b>μ<sub>i</sub></b> |
| H <sub>ox</sub>                        | 1942.08              | 1.79                 | 0.426                |
| H <sub>red</sub>                       | 1935.23              | 2.36                 | 0.535                |
| H <sub>ox</sub> H                      | 1946.15              | 1.83                 | 0.546                |
| H <sub>red</sub> 'H                    | 1938.67              | 2.76                 | 0.705                |

Where x<sub>i</sub>, w<sub>i</sub> and μ<sub>i</sub> are parameters for each of the four pseudo-Voigt peaks fit to the following formula, while A<sub>i</sub> was allowed to vary:

$$f(x) = Y_0 + \sum_i A_i \left[ \frac{1 - \mu_i}{\sqrt{2\pi w_i^2}} \exp(-(x - x_i)^2 / 2w_i^2) + \frac{\mu_i}{w_i \pi (1 + ((x - x_i) / w_i)^2)} \right]$$

x<sub>i</sub> = peak center, w<sub>i</sub> = broadening factor, μ<sub>i</sub> = profile shape factor

## Supplementary Figures

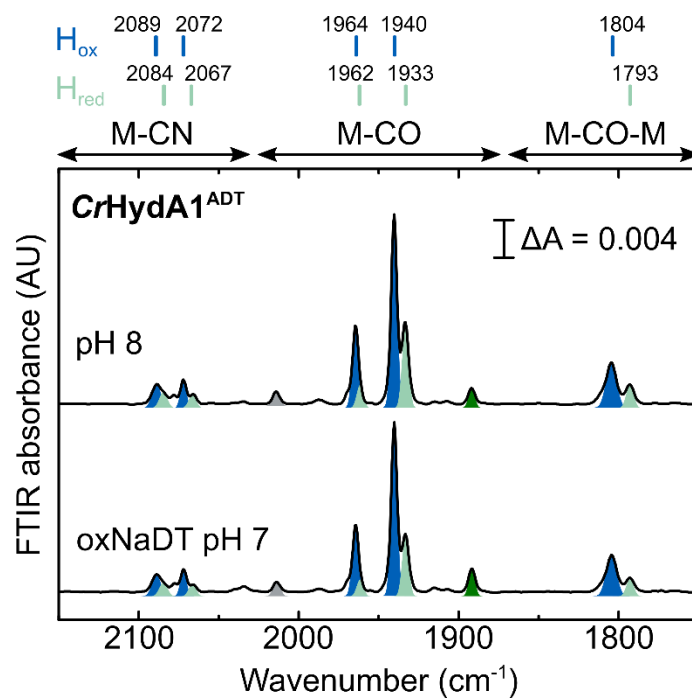

**Figure S1 – Effect of oxNaDT on *CrHydA1*<sup>ADT</sup> at pH 7.** IR spectra of *CrHydA1* ( $\approx 730 \mu\text{M}$ ) diluted in 25 mM Tris-HCl, 25 mM NaCl, pH 8 (top) and in a solution of oxidized NaDT (0.83 M final concentration) corrected to pH 7 (bottom). At neutral pH the H<sub>ox</sub>H state does not form in the presence of the oxidation products of NaDT.



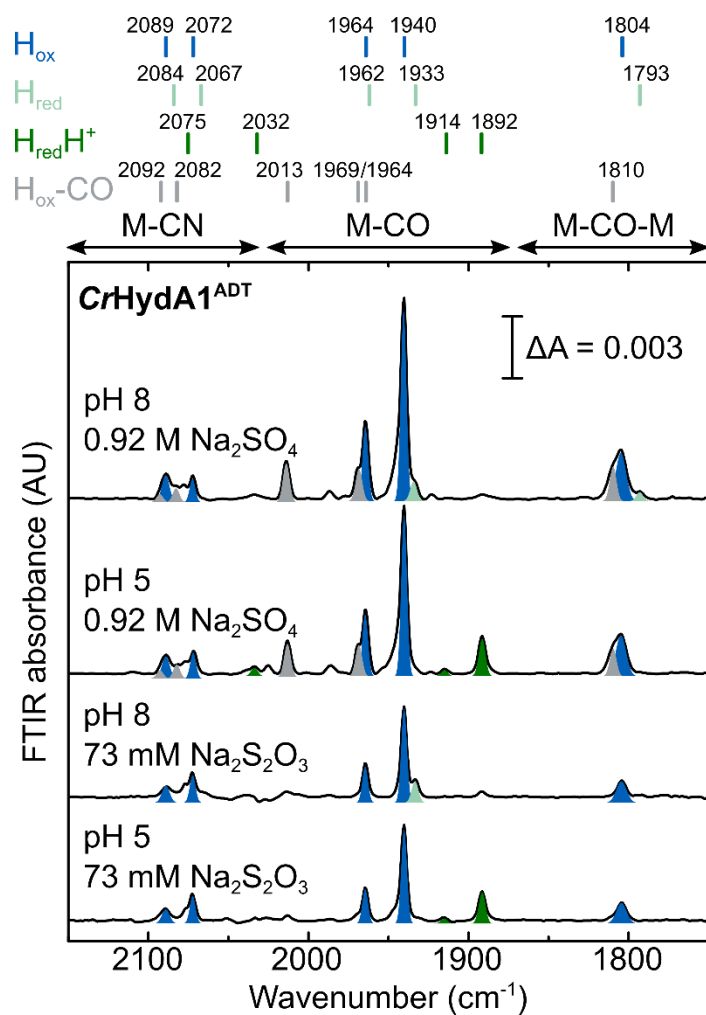

**Figure S2 – Effect of Na<sub>2</sub>SO<sub>4</sub> and Na<sub>2</sub>S<sub>2</sub>O<sub>3</sub> on CrHydA1<sup>ADT</sup>.** IR spectra of CrHydA1 (0.2 mM) diluted in 20 mM mixed buffer (see experimental section) at pH 8 and pH 5 in the presence of 0.92 M Na<sub>2</sub>SO<sub>4</sub> or 73 mM Na<sub>2</sub>S<sub>2</sub>O<sub>3</sub>.

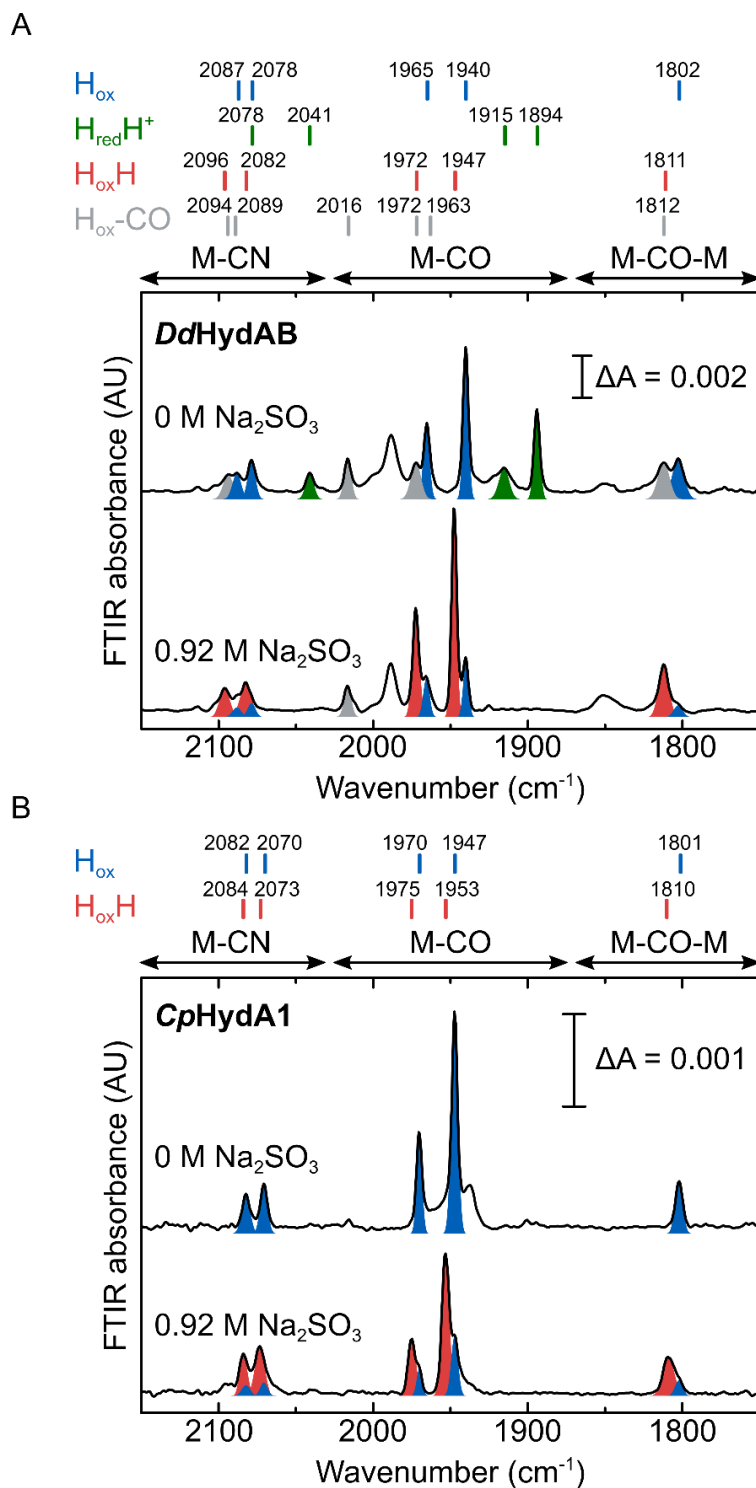

**Figure S3 – Formation of the  $H_{ox}H$  state in *DdHydAB* and *CpHydA1* with  $Na_2SO_3$  and low pH.** **A)** IR spectra of *DdHydAB* ( $\approx 250 \mu M$ ) in 20 mM mixed buffer (see experimental section), pH 6 (top) and in 0.92 M  $Na_2SO_3$  pH 6 (bottom). **B)** Same as **A** but with *CpHydA1* ( $\approx 60 \mu M$ ). The unassigned peaks at  $1988 \text{ cm}^{-1}$  and  $1950 \text{ cm}^{-1}$  in the *DdHydAB* spectra are often observed for this enzyme and appear to be related to the longer artificial maturation process compared with *CpHydA1* and *CrHydA1*. Further investigation of the origin of these peaks will be the subject of ongoing investigation.

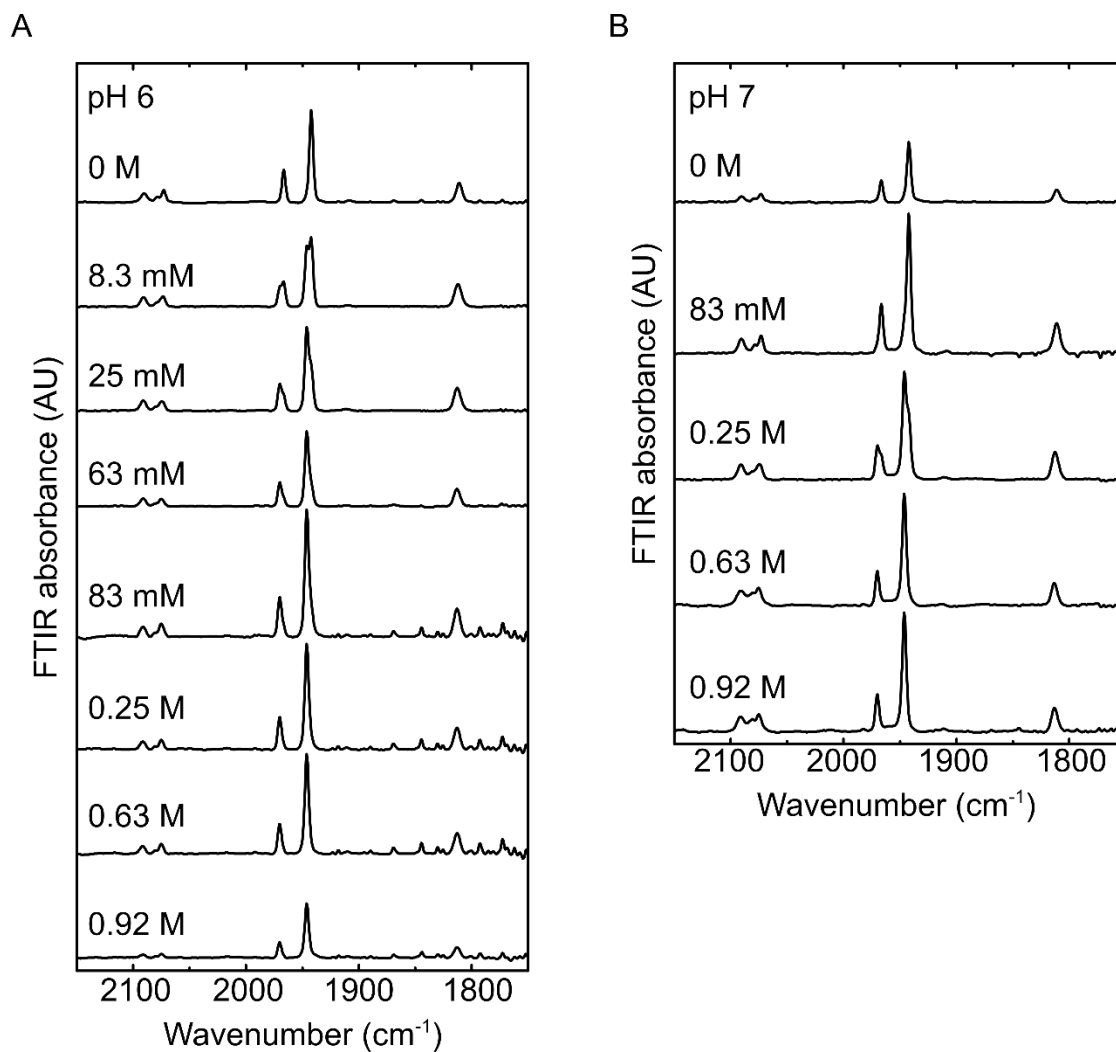

**Figure S4 – Full titration of *CrHydA1*<sup>PDT</sup> with Na<sub>2</sub>SO<sub>3</sub> at pH 6 and pH 7 under N<sub>2</sub>.** IR spectra of *CrHydA1*<sup>PDT</sup> ( $\approx 420 \mu\text{M}$ ) diluted in 20 mM mixed buffer (see experimental section) at pH 6 (**A**) and pH 7 (**B**) with various concentrations of Na<sub>2</sub>SO<sub>3</sub>. Selected spectra are shown in **Figure 3** (main text).

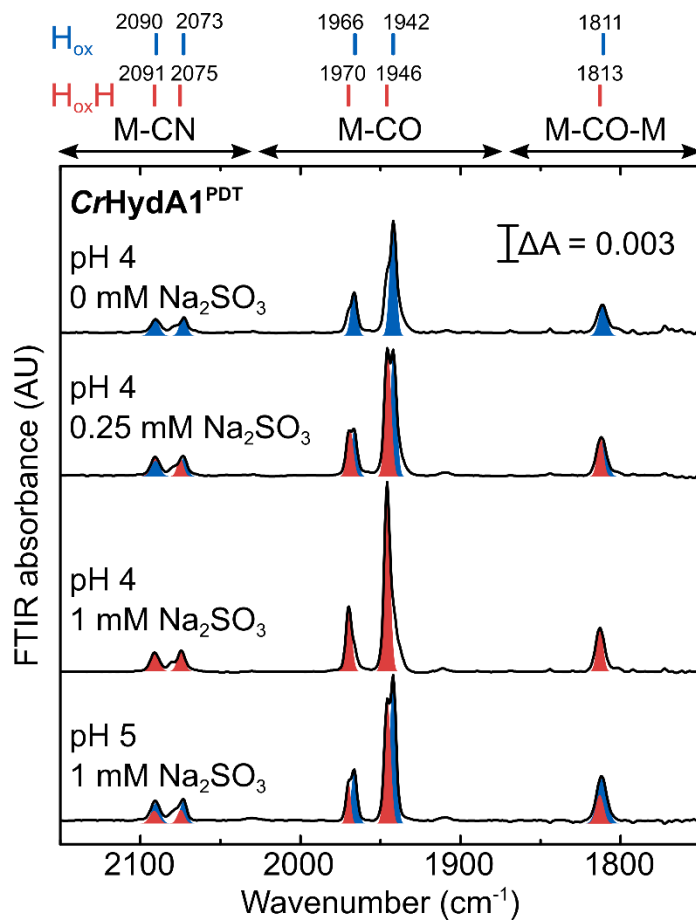

**Figure S5 – Titration of CrHydA1<sup>PDT</sup> with Na<sub>2</sub>SO<sub>3</sub> at pH 4 and pH 5 under N<sub>2</sub>.** IR spectra of CrHydA1<sup>PDT</sup> ( $\approx 420 \mu\text{M}$ ) diluted in 20 mM mixed buffer (see experimental section) at pH 4 and pH 5 with various concentrations of Na<sub>2</sub>SO<sub>3</sub>.

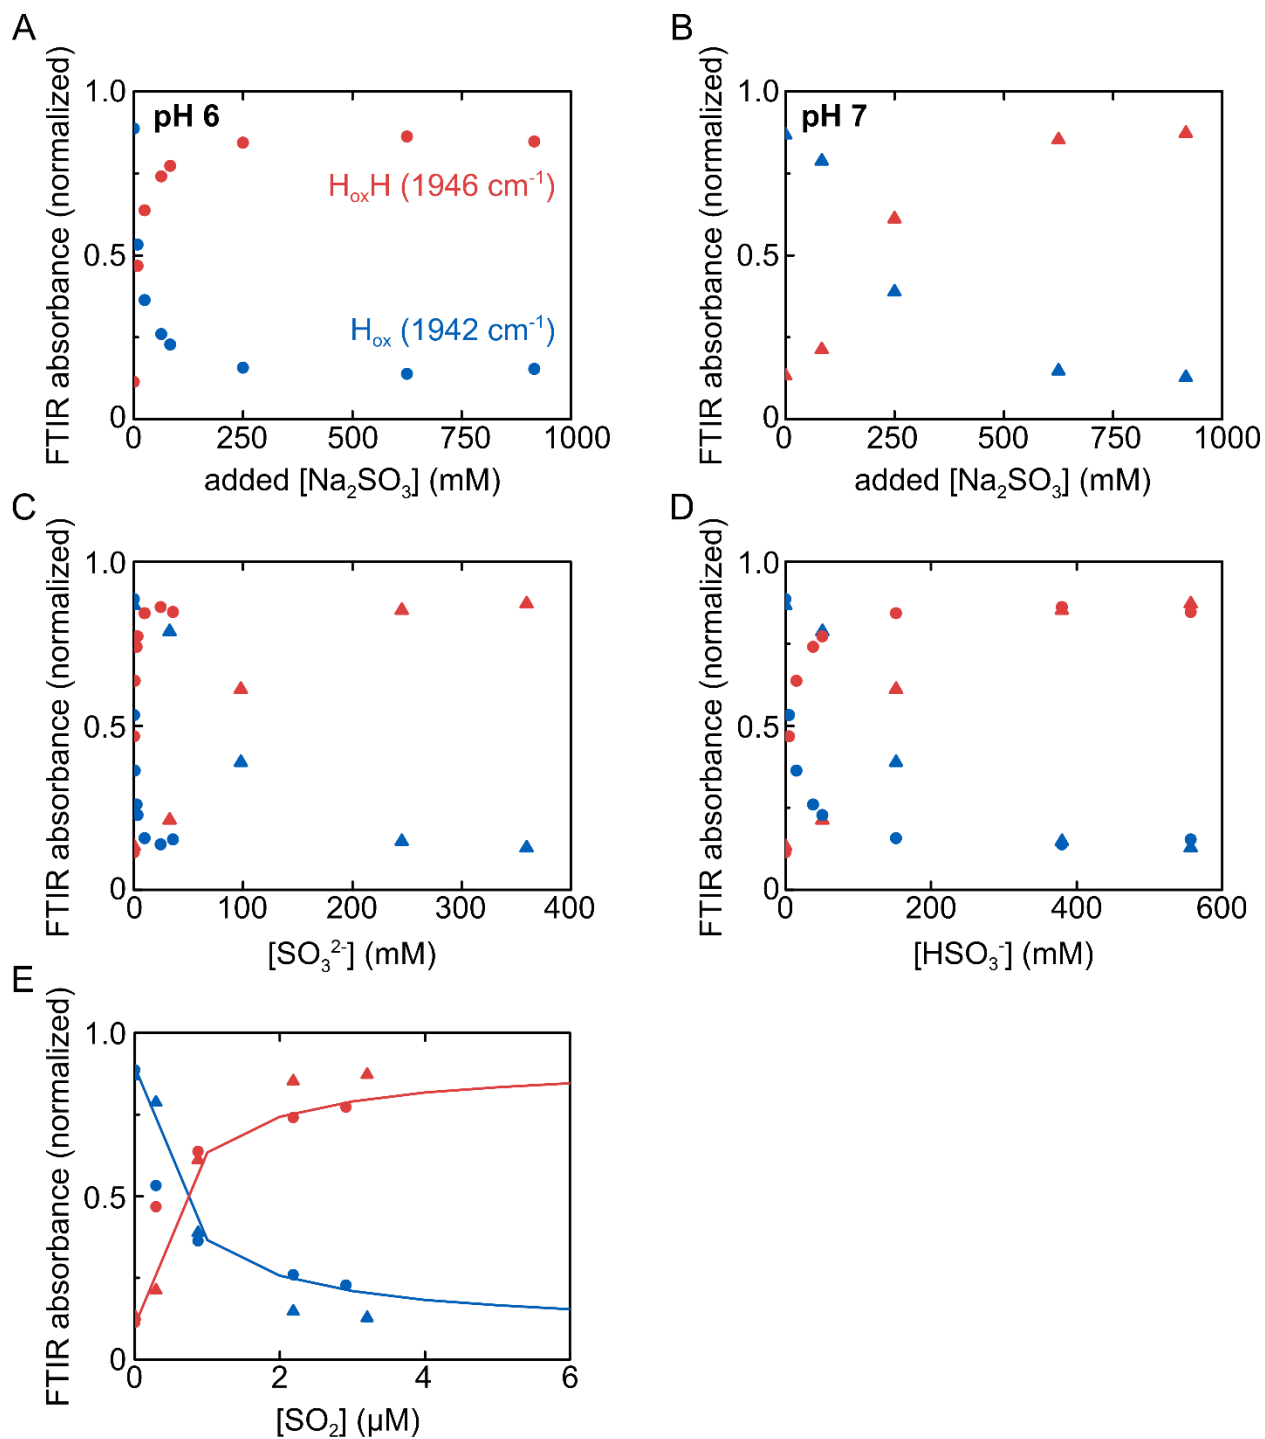

**Figure S6 – Titration curves of *CrHydA1*<sup>PDT</sup>.** **A, B** Variation in the intensity of the  $1942\text{ cm}^{-1}$  ( $\text{H}_{\text{ox}}$ ) and  $1946\text{ cm}^{-1}$  ( $\text{H}_{\text{ox}}\text{H}$ ) peaks with the concentration of added  $\text{Na}_2\text{SO}_3$  at pH 6 (**A**) and pH 7 (**B**). **C, D** as in **A** and **B**, but the data (triangles for pH 7, circles for pH 6) are plotted as a function of the estimated concentration of  $\text{SO}_3^{2-}$  (**C**) and  $\text{HSO}_3^-$  (**D**). **E** Expanded version of the region from 0 to 6  $\mu\text{M}$   $\text{SO}_2$  in **Figure 3C** (main text).

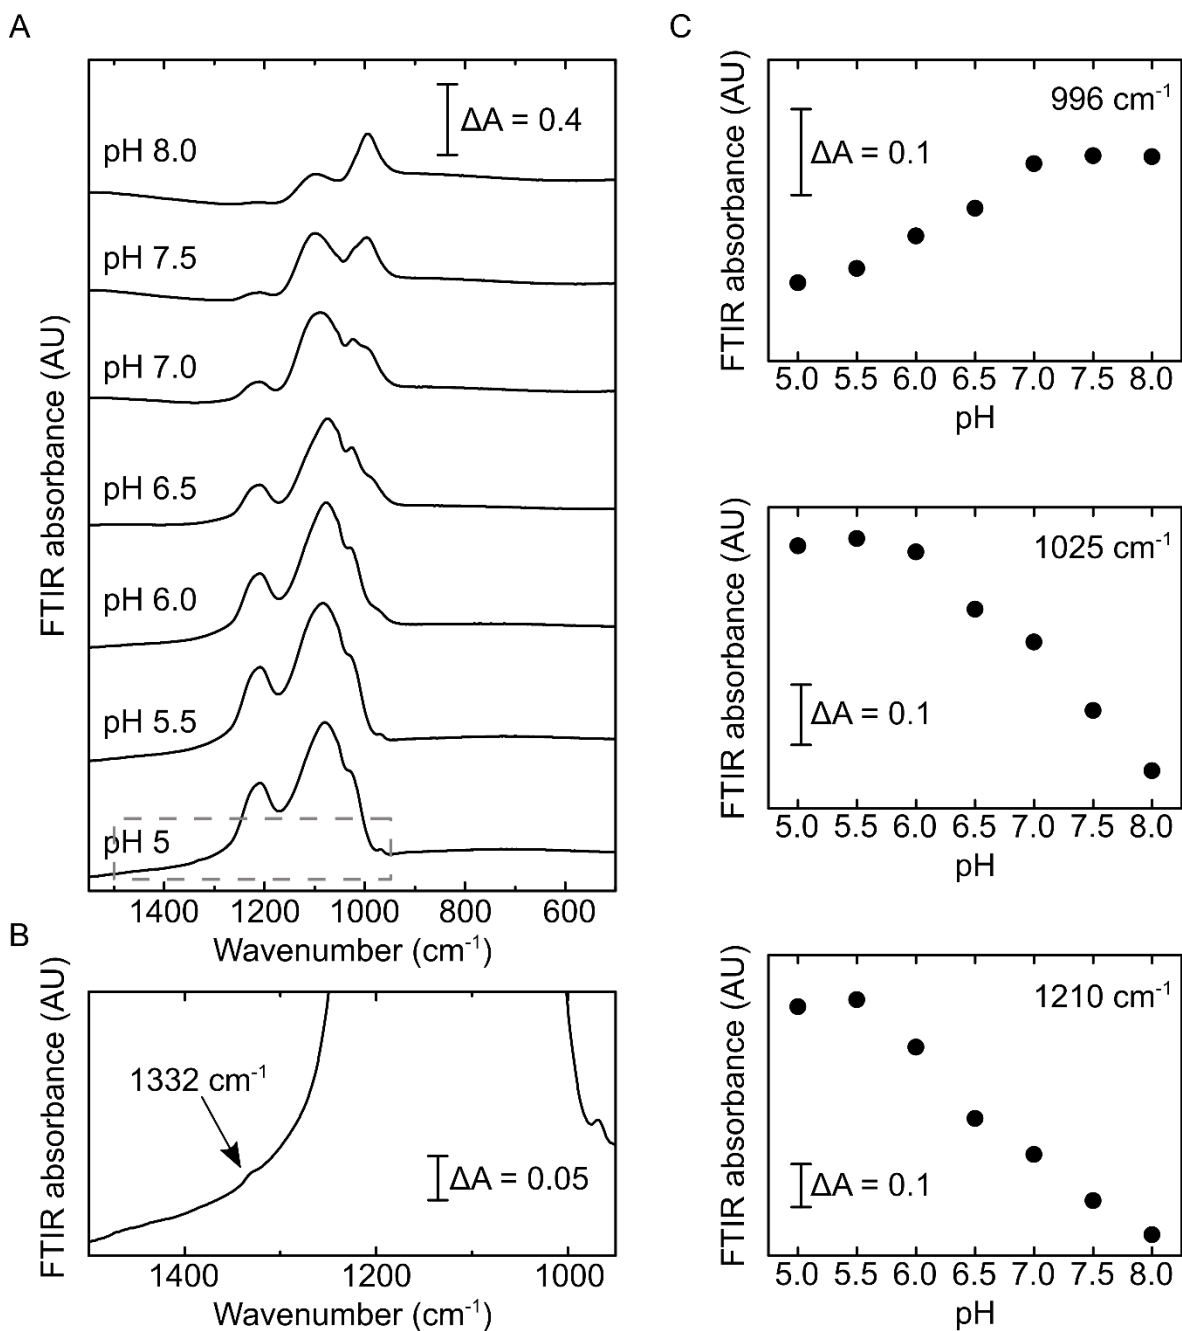

**Figure S7 – Speciation of  $\text{SO}_3^{2-}$  as a function of pH monitored by IR spectroscopy.** **A)** Spectra of  $\text{Na}_2\text{SO}_3$  (1 M) at different pH values. **B)** Enlargement of the pH 5 spectrum (dashed rectangle in **A**), indicating the presence of dissolved  $\text{SO}_2$  ( $\nu_3$  band at  $1332 \text{ cm}^{-1}$ , ref<sup>21</sup>). **C)** Titration of the features at  $996 \text{ cm}^{-1}$ ,  $1025 \text{ cm}^{-1}$ ,  $1210 \text{ cm}^{-1}$  with pH. The feature at  $996 \text{ cm}^{-1}$  was assigned to  $\text{SO}_3^{2-}$ , while the ones at  $1025 \text{ cm}^{-1}$ ,  $1210 \text{ cm}^{-1}$  to  $\text{HSO}_3^-$  or one of its dimers as reported in ref<sup>21</sup>.

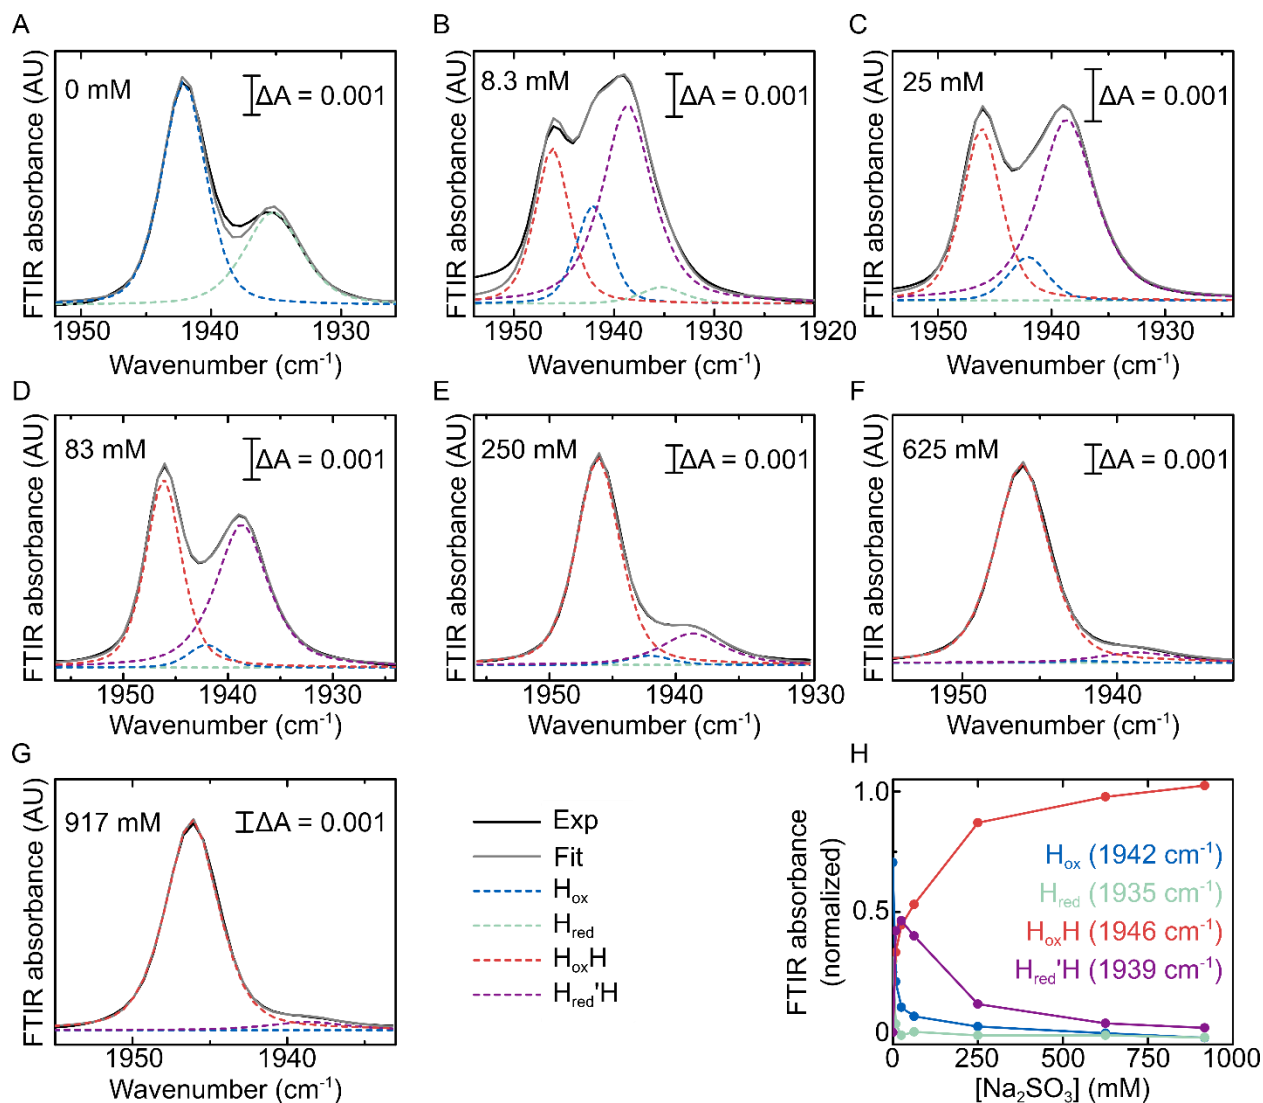

**Figure S8 – Full titration of *CrHydA1*<sup>PDT</sup> with Na<sub>2</sub>SO<sub>3</sub> under 2% H<sub>2</sub> at pH 6. A-G)** Pseudo-Voigt peak-fitting analysis of the 1955-1920 cm<sup>-1</sup> in IR spectra of *CrHydA1*<sup>PDT</sup> measured under 2% H<sub>2</sub> at pH 6. **H)** Variation in the intensity of the 1942 cm<sup>-1</sup> (H<sub>ox</sub>), 1935 cm<sup>-1</sup> (H<sub>red</sub>), 1946 cm<sup>-1</sup> (H<sub>ox</sub>H) and 1939 cm<sup>-1</sup> (H<sub>red</sub>'H) peaks from **A-G** with the Na<sub>2</sub>SO<sub>3</sub> concentration at pH 6. The lines connecting the points in **H** are for visual purposes only.

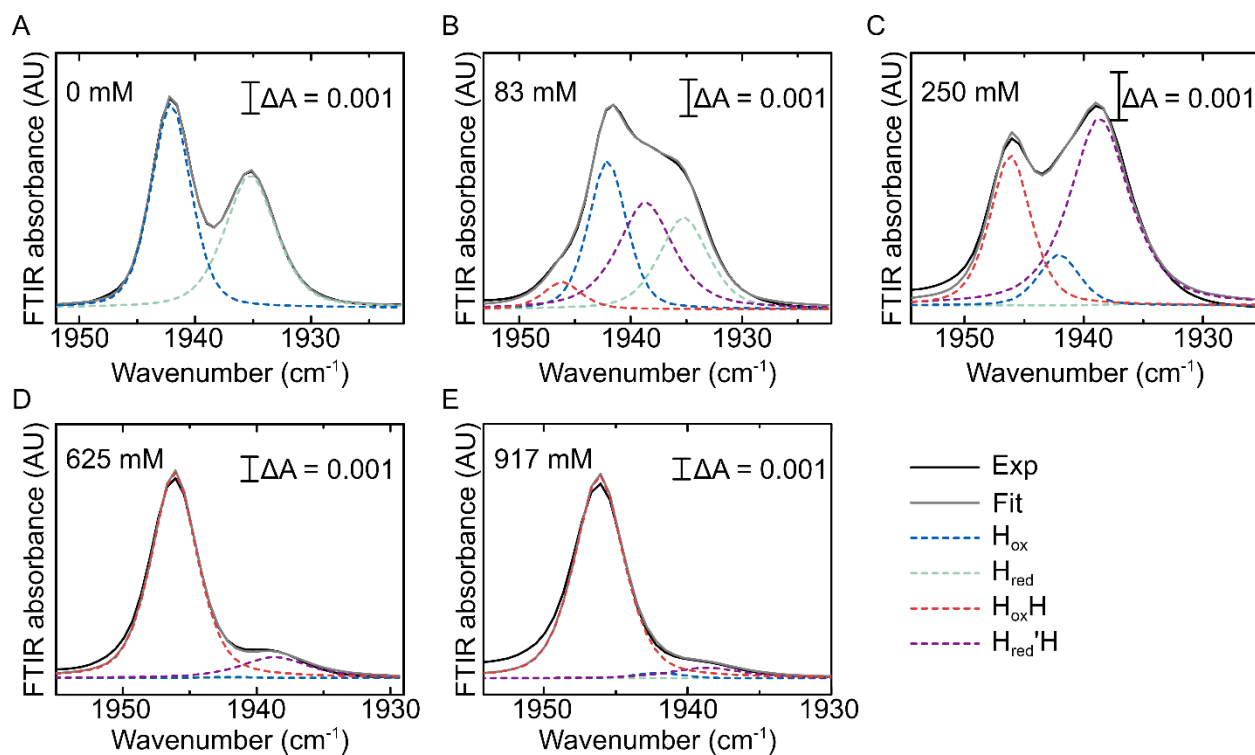

**Figure S9 – Full titration of *CrHydA1*<sup>PDT</sup> with Na<sub>2</sub>SO<sub>3</sub> under 2% H<sub>2</sub> at pH 7. A-E) Pseudo-Voigt peak-fitting analysis of the 1955-1920 cm<sup>-1</sup> in IR spectra of *CrHydA1*<sup>PDT</sup> measured under 2% H<sub>2</sub> at pH 7. Data in panel B is also shown in **Figure 4A** (main text).**



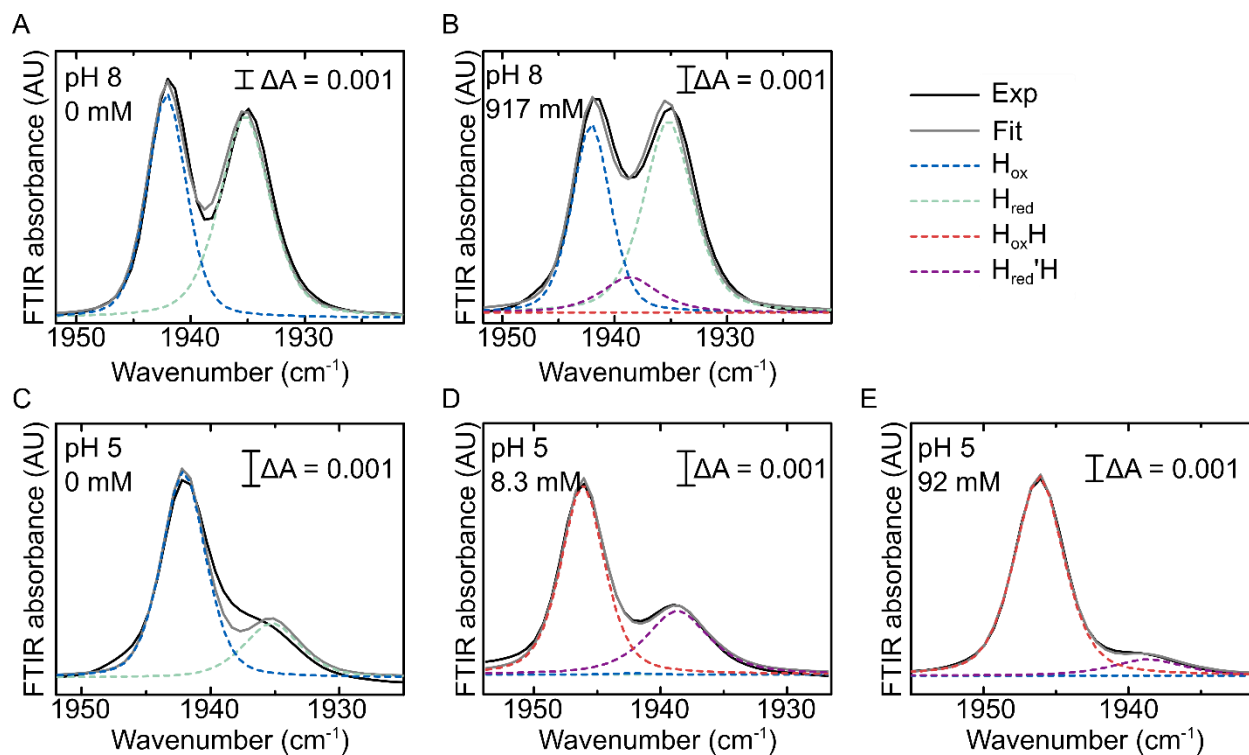

**Figure S10 – Full titration of *CrHydA1*<sup>PDT</sup> with Na<sub>2</sub>SO<sub>3</sub> under 2% H<sub>2</sub> at pH 8 and pH 5.** Pseudo-Voigt peak-fitting analysis of the 1955-1920 cm<sup>-1</sup> in IR spectra of *CrHydA1*<sup>PDT</sup> measured under 2% H<sub>2</sub> at pH 8 (A, B) and 5 (C, D, E).

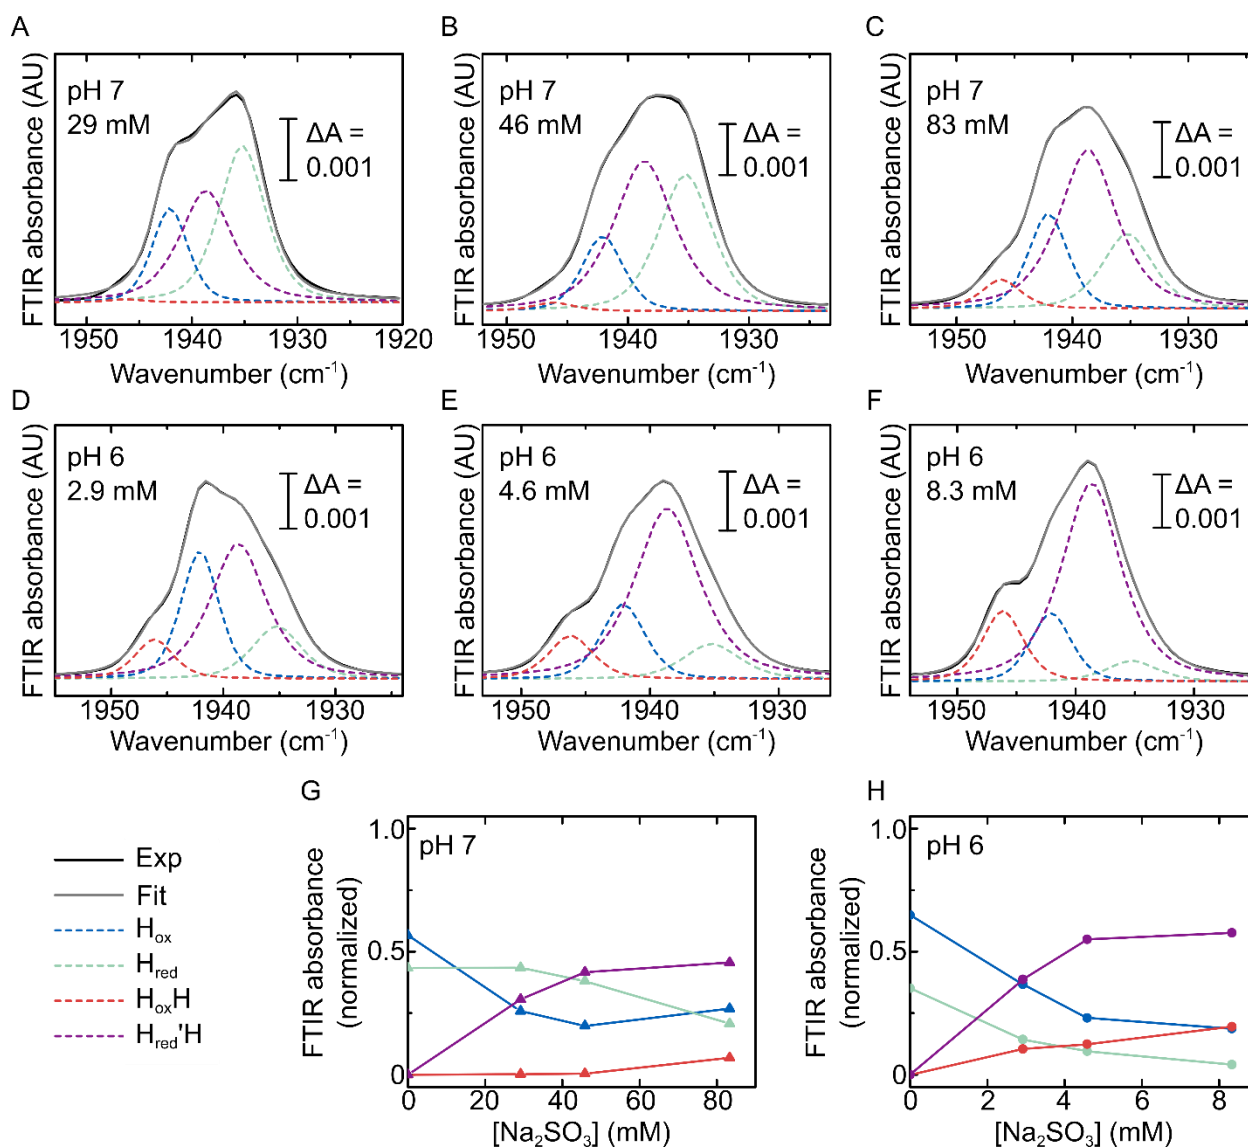

**Figure S11 – Calculation of the redox potential of  $H_{ox}/H_{red}$  and  $H_{ox}H/H_{red}'H$ .** Pseudo-Voigt peak-fitting analysis of the 1955-1920  $cm^{-1}$  of additional IR spectra of  $CrHydA1^{PDT}$  measured under 2%  $H_2$  at pH 7 (A-C) and 6 (D-F) at low concentrations of sulfite. G, H) Variation in the intensity of the 1942  $cm^{-1}$  ( $H_{ox}$ , blue), 1935  $cm^{-1}$  ( $H_{red}$ , cyan), 1946  $cm^{-1}$  ( $H_{ox}H$ , red) and 1939  $cm^{-1}$  ( $H_{red}'H$ , purple) peaks with the  $Na_2SO_3$  concentration at pH 7 (G, data from A-C) and at pH 6 (H, data from D-F). The lines connecting the points in G, H are for visual purposes only. At low  $Na_2SO_3$  concentrations, all four state ( $H_{ox}$ ,  $H_{red}$ ,  $H_{ox}H$  and  $H_{red}'H$ ) are present at the same time in most cases. At higher concentrations, oxidation of  $H_2$  by the added  $Na_2SO_3$  becomes more prominent, potentially causing an overestimation of the redox potentials. The redox potentials can be calculated for each condition from the  $H_{ox}/H_{red}$  and  $H_{ox}H/H_{red}'H$  ratios using the Nernst equation and adjusting the  $2H^+/H_2$  redox potential according to the pH (7 or 6) – for more details see ref<sup>19</sup>. Data in A and B were not used to determine the  $H_{ox}H/H_{red}'H$  redox potential, as the  $H_{ox}H$  state is not present (see also G). Data from Figure S8B and Figure S9B were included in the calculation of both  $H_{ox}/H_{red}$  and  $H_{ox}H/H_{red}'H$  redox potentials. The redox potentials were calculated to be  $E_m(H_{ox}/H_{red}) = -349 (\pm 17)$  mV and  $E_m(H_{ox}H/H_{red}'H) = -293 (\pm 26)$  mV (mean  $\pm$  standard deviation, based on the low  $Na_2SO_3$  datapoints at pH 6 and 7).

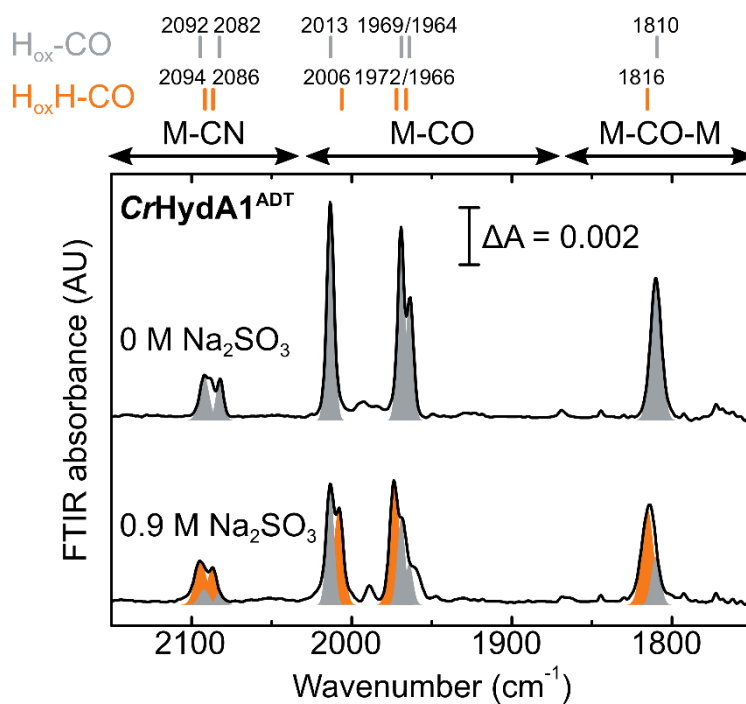

**Figure S12 – Formation of the  $H_{ox}H-CO$  state.** IR spectra of  $CrHydA1^{ADT}$  ( $\approx 360 \mu M$ ) diluted in 20 mM mixed buffer at pH 5 (top) or in 0.92 M  $Na_2SO_3$  at pH 5 (bottom) and flushed with 100% CO gas for 10 min before measuring the spectra.

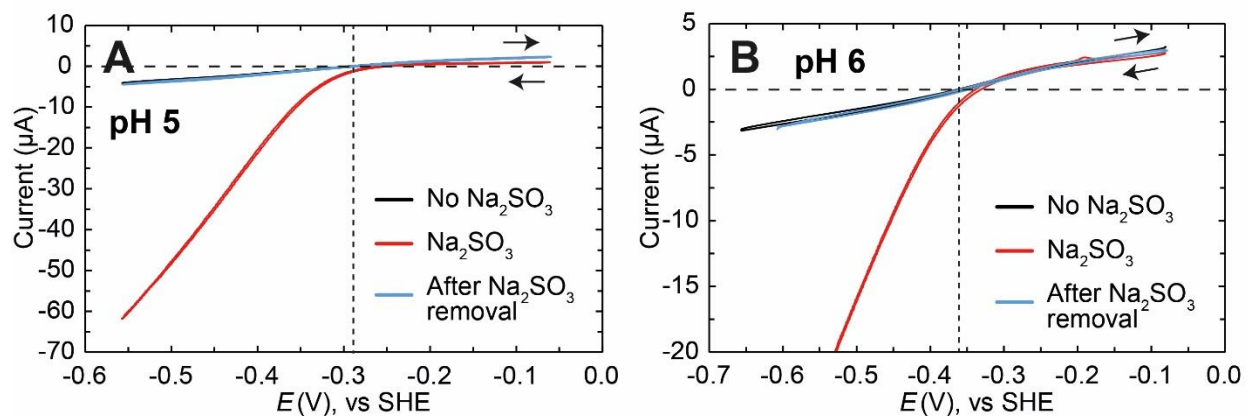

**Figure S13** – Cyclic voltammetry of *DdHydAB* in the presence of Na<sub>2</sub>SO<sub>3</sub>. Enlarged versions of the CVs reported in **Figure 6A** (A, pH 5) and **Figure 6B** (B, pH 6) in the main text. The black arrows indicate the scan direction of the CV. The dashed horizontal line shows the zero current position and the dashed vertical line shows the equilibrium 2H<sup>+</sup>/H<sub>2</sub> potential at each pH value.

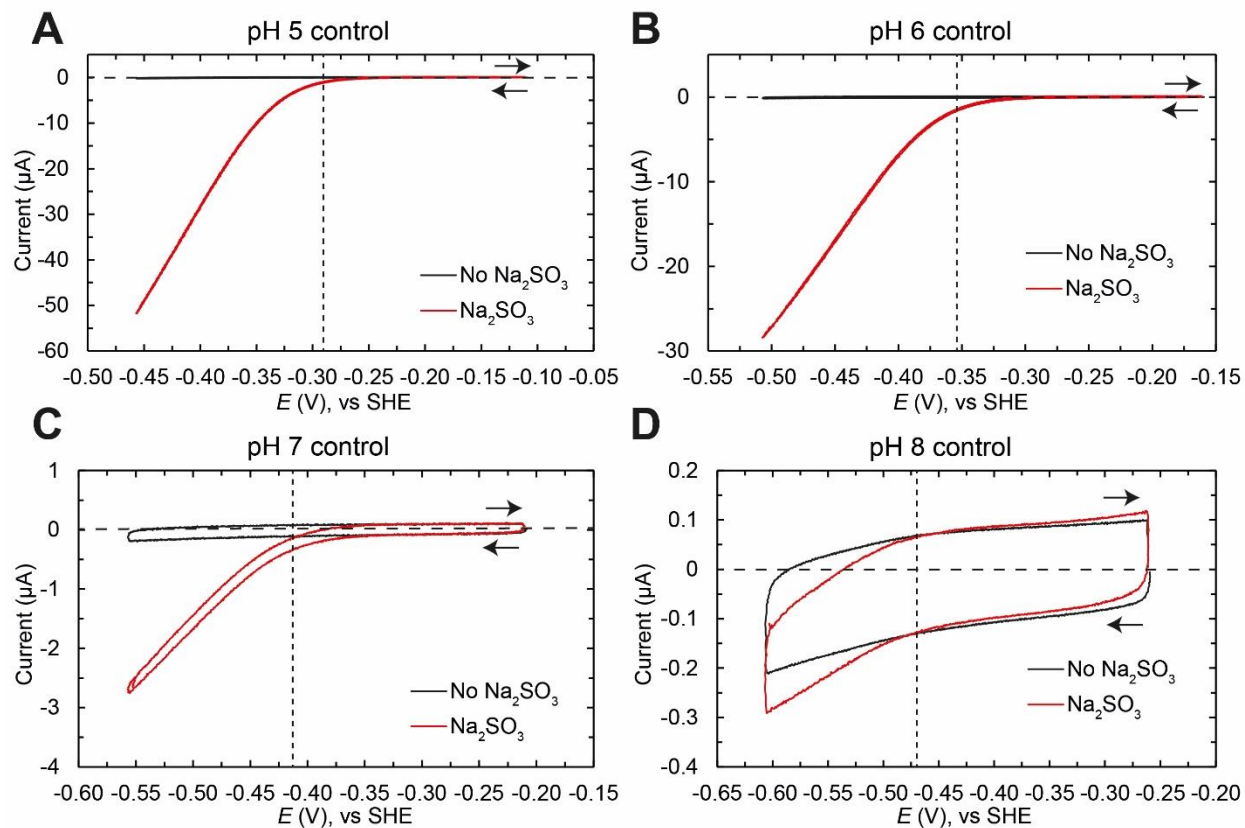

**Figure S14** – Cyclic voltammetry of  $\text{Na}_2\text{SO}_3$  at various pH values. A blank PGE electrode was used for cyclic voltammetry in 20 mM mixed buffer containing 100 mM NaCl at pH 5 (A), 6 (B), 7 (C) and 8 (D) in the absence (black curve) and presence (red curve) of 40 mM  $\text{Na}_2\text{SO}_3$ . Cyclic voltammetry was measured at 25 °C with 100%  $\text{H}_2$  flow and 2000 rpm rotation rate. The black arrows indicate the scan direction of the CV. The dashed horizontal line shows the zero current position and the dashed vertical line shows the equilibrium  $2\text{H}^+/\text{H}_2$  potential at each pH value.

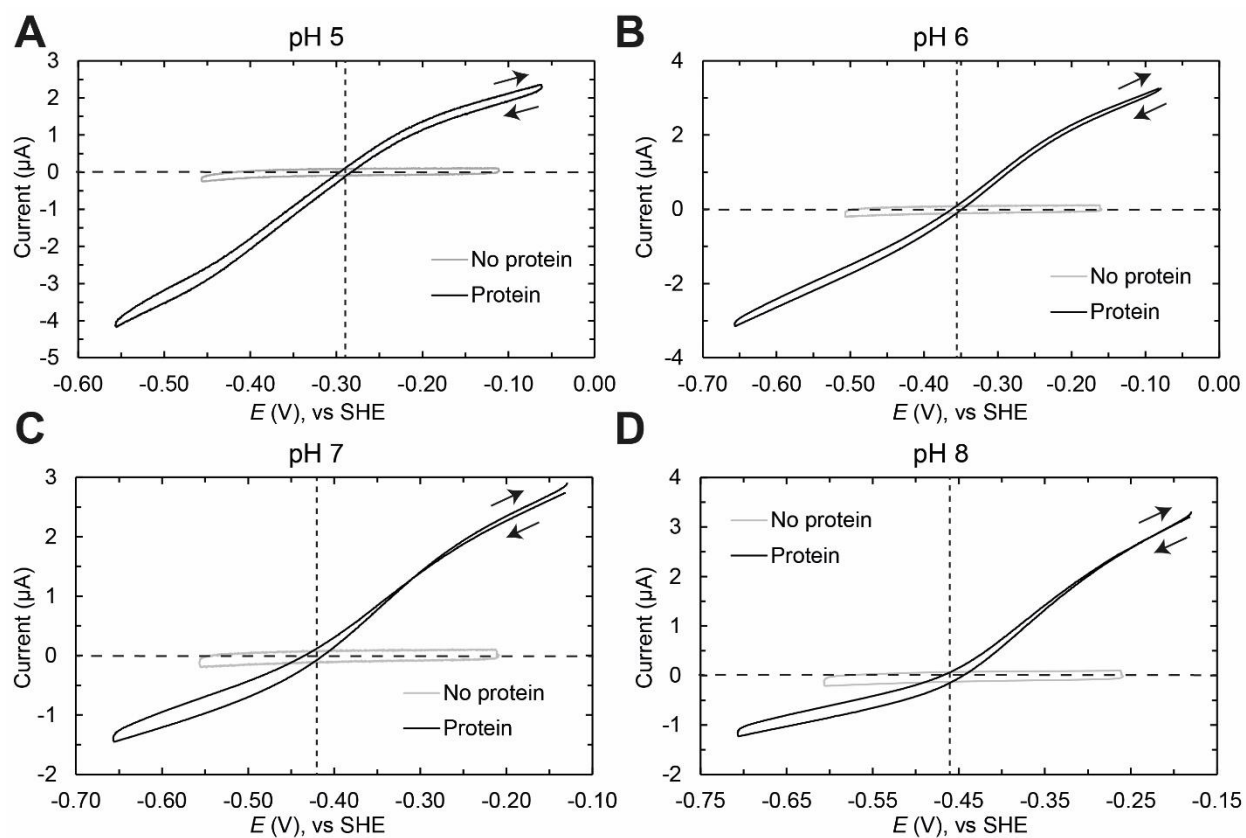

**Figure S15** – Cyclic voltammetry of *DdHydAB* at various pH values. A blank (gray curves) PGE electrode and a *DdHydAB* modified PGE electrode (black curves) were used for cyclic voltammetry in 20 mM mixed buffer containing 100 mM KCl at pH 5 (**A**), 6, (**B**), 7 (**C**) and 8 (**D**). Cyclic voltammetry was measured at 25 °C with 100%  $H_2$  flow and 2000 rpm rotation rate. The black arrows indicate the scan direction of the CV. The dashed horizontal line shows the zero current position and the dashed vertical line shows the equilibrium  $2H^+/H_2$  potential at each pH value.

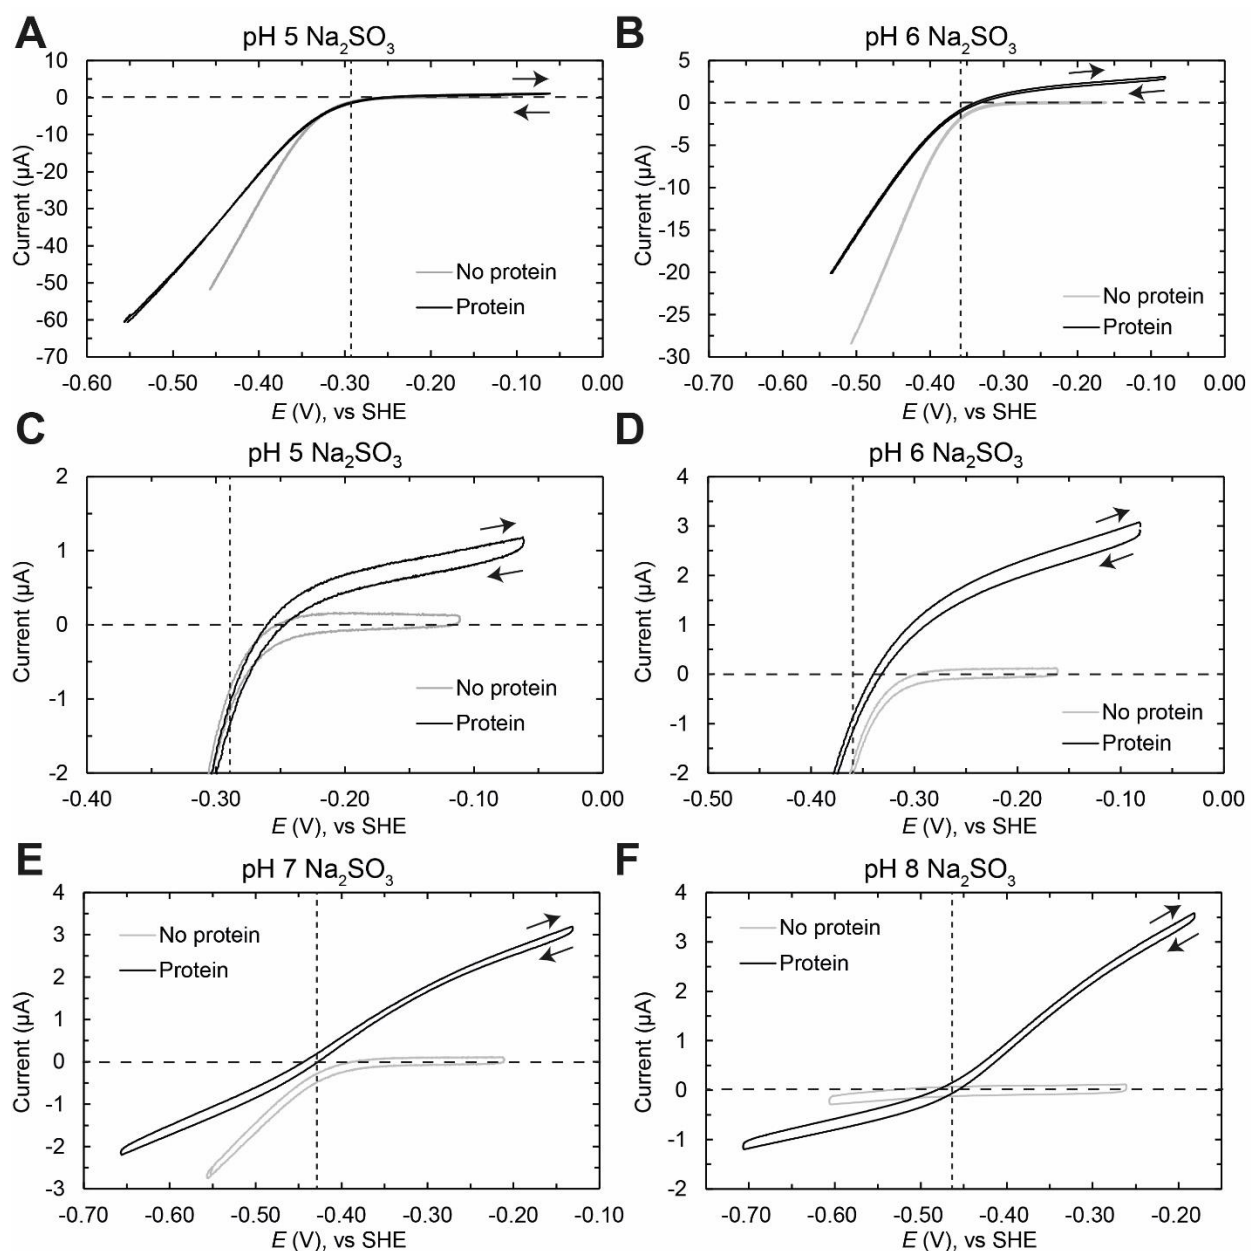

**Figure S16** – Cyclic voltammetry of *DdHydAB* at various pH values in the presence of  $\text{Na}_2\text{SO}_3$ . A blank (gray curves) PGE electrode and a *DdHydAB* modified PGE electrode (black curves) were used for cyclic voltammetry in 20 mM mixed buffer containing 100 mM KCl and 40 mM  $\text{Na}_2\text{SO}_3$  at pH 5 (A), 6 (B), 7 (E) and 8 (F). Enlarged versions of the  $\text{H}_2$  oxidation region of A and B are shown in C and D, respectively. Cyclic voltammetry was measured at 25 °C with 100%  $\text{H}_2$  flow and 2000 rpm rotation rate. The black arrows indicate the scan direction of the CV. The dashed horizontal line shows the zero current position and the dashed vertical line shows the equilibrium  $2\text{H}^+/\text{H}_2$  potential at each pH value.

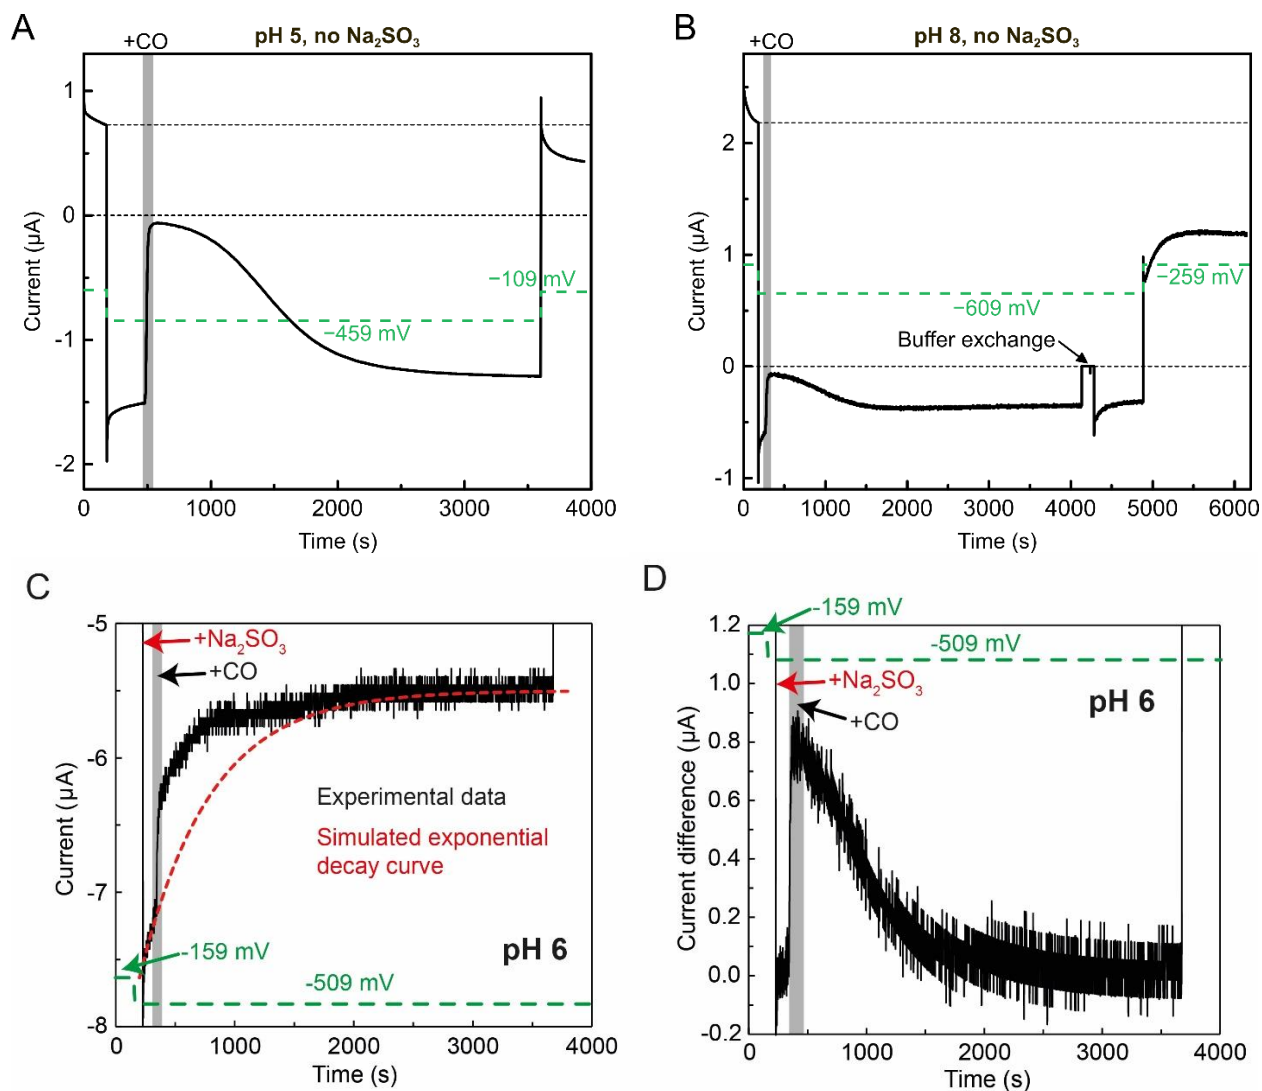

**Figure S17** – Chronoamperometry experiments of *DdHydAB* in the absence of Na<sub>2</sub>SO<sub>3</sub>. A *DdHydAB* modified PGE electrode was used for chronoamperometry experiments in 20 mM mixed buffer containing 100 mM NaCl at pH 5 (**A**) and 8 (**B**) under 1 bar 90 % H<sub>2</sub> in N<sub>2</sub> (1000 ml/min), at 25 °C and with 2000 rpm rotation. The potential was varied as indicated by the green profile, where all potentials are reported vs SHE. At pH 5 (**A**), the potential was set initially to -109 mV, then to -459 mV and finally to -109 mV. At pH 8 (**B**) it was set initially to -259 mV, then to -609 mV and finally to -259 mV. Addition of 10% CO to the gas mixture (replacing 10% N<sub>2</sub>) is indicated by the shaded area. In **B** after 4000 s the buffer was exchanged to fresh buffer. (**C**) Expanded region of Figure 7B (pH 6 with Na<sub>2</sub>SO<sub>3</sub>) from the main text with a simulated exponential decay curve (red dashed line) overlaying the experimental data. (**D**) The current difference between the experimental data and the simulated exponential decay curve from **C** is plotted showing a positive increase in the current after addition of CO, followed by a decay of the difference back to 0. This behavior is analogous to that observed for the experiments in the absence of Na<sub>2</sub>SO<sub>3</sub> (**A** and **B**).



## Supplementary Discussion: pH dependent redox potentials

As mentioned in the main text, Senger *et al.* observed a pH dependent redox potential for both the  $H_{ox}/H_{red}'$  and  $H_{ox}H/H_{red}'H$  (their nomenclature) transitions in  $CrHydA1^{PDT}$ , as well as a pH dependent formation of  $H_{ox}H$  from  $H_{ox}$ .<sup>10</sup> They attributed this to protonation of the  $[4Fe-4S]_H$  subcluster of the H-cluster at two distinct sites – one site was responsible for the pH dependence of the  $H_{ox}/H_{red}$  and  $H_{ox}/H_{ox}H$  transitions, and the other site was responsible for the  $H_{ox}H/H_{red}'H$  and  $H_{red}/H_{red}'H$  transitions. However, as we mentioned in a previous report,<sup>19</sup> simply having a proton-dependent step linking  $H_{ox}$  and  $H_{ox}H$  as well as  $H_{red}'$  and  $H_{red}'H$  gives rise to apparent pH dependencies for all of the above-mentioned transitions. As such, two protonation sites are not required. We also demonstrated that, in the absence of sodium dithionite, neither  $H_{ox}H$  nor  $H_{red}'H$  are observed.<sup>19</sup> This behavior is not in agreement with a simple protonation of the  $[4Fe-4S]$  cluster.

In the current work, we have shown that the formation of  $H_{ox}H$  and  $H_{red}'H$  are strictly dependent on  $Na_2SO_3$ , an oxidation product of sodium dithionite. Moreover, these two states only form with  $Na_2SO_3$  at low pH implicating  $SO_2$  as the species that interacts with the H-cluster to form  $H_{ox}H$  and  $H_{red}'H$ . Accordingly, we have renamed these states as  $H_{ox-DT_i}$  and  $H_{red-DT_i}$  (for dithionite inhibited). With this knowledge at hand we can try and explain the redox titrations published by Senger *et al.* In Figure S18, theoretical redox potential titrations of  $CrHydA1^{PDT}$  can be observed for pH 7.5 (Figure S18A), pH 6.5 (Figure S18B) and pH 5.5 (Figure S18C), reflecting the titrations presented in Figure 3 of Senger *et al.*<sup>10</sup> These figures were generated using the model shown in Figure S18D in which  $H_{ox}$  and  $H_{ox-DT_i}$  undergo a simple one-electron reduction to give  $H_{red}$  and  $H_{red-DT_i}$ , respectively. Meanwhile,  $H_{ox}$  and  $H_{red}$  convert to  $H_{ox-DT_i}$  and  $H_{red-DT_i}$  by simple binding of  $SO_2$ . As the concentration of  $SO_2$  depends on pH, the  $SO_2$  bound states are more abundant in the pH 5.5 titration than in the pH 6.5 and pH 7.5 titrations. Furthermore, as the redox potential for the  $H_{ox-DT_i}/H_{red-DT_i}$  transition is more positive than the  $H_{ox}/H_{red}$  transition, the apparent redox midpoint potentials of all the titration curves shift with pH, having a value of  $\approx -350$  mV at pH 7.5,  $\approx -320$  mV at pH 6.5, and  $\approx -300$  mV at pH 5.5. Importantly, while the redox potentials for the  $H_{ox}/H_{red}$  and  $H_{ox-DT_i}/H_{red-DT_i}$  transitions were explicitly defined in the model to be pH-independent, the apparent redox potential for the same transitions appear to be pH-dependent in Figures S18A-C. This is simply the consequence of the coupled equilibria (Figure S18D).

A further curiosity of the results from Senger *et al.* is that, as they titrate the hydrogenase from high potential to low potential at pH 6.5 and pH 5.5, they change from a mixture of  $H_{ox}/H_{ox-DT_i}$  to mostly  $H_{red-DT_i}$  and in a further step to  $H_{red}$  (see Figure 3 in ref.<sup>10</sup>), suggesting that  $H_{red-DT_i}$  conversion to  $H_{red}$  requires reduction. It is important to note that in this experiment the researchers apply an electrochemical potential while flushing gas that has been bubbled through a solution containing NaDT. Our explanation of these results is that at high potentials, NaDT will be oxidized by the electrode generating  $SO_2$ , which can bind to  $H_{ox}$  forming  $H_{ox-DT_i}$ . As the potential becomes more negative,  $H_{ox-DT_i}$  is converted to  $H_{red-DT_i}$ , but at the same time NaDT stops being oxidized to  $SO_2$  and the  $SO_2$  that was produced at high potentials is purged from the protein film because of the constant gas flow. This decreases the  $SO_2$  concentration to zero, allowing  $H_{red-DT_i}$  to convert back to  $H_{red}$ . This behavior is not easily described by a simple thermodynamic model and as such is not observed in Figure S18. A final phenomenon from Senger *et al.* that we cannot yet explain is that they measure the redox potential for  $H_{ox}/H_{red}$  at pH 7.5 to be  $\approx -450$  mV. Multiple publications from our laboratory have estimated this redox potential to be  $\approx -350$  mV using both spectroelectrochemical IR titrations<sup>19, 22</sup> and pH titrations under  $H_2$ <sup>19</sup> (also in this study).

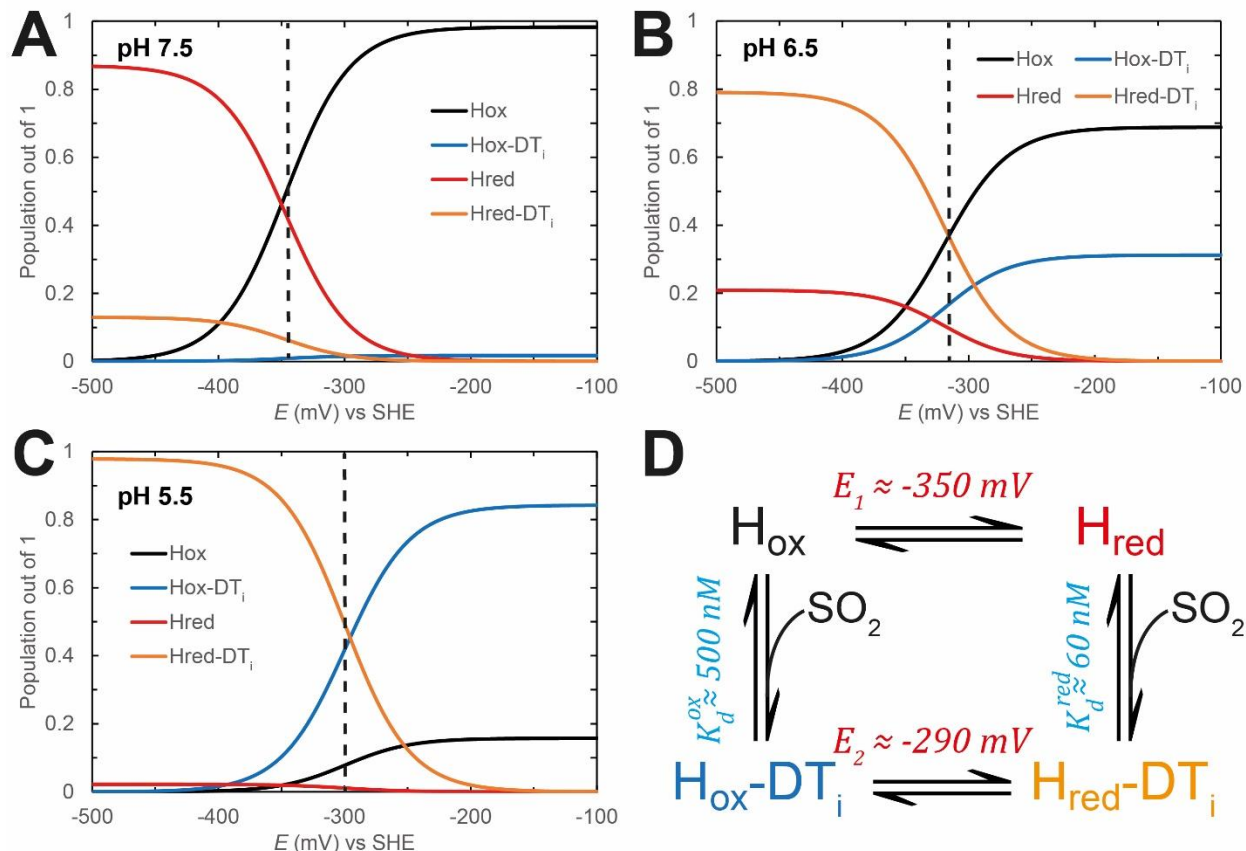

**Figure S18** – Model for pH dependent redox potential titrations of  $CrHydA1^{PDT}$ . The variation in the populations of the  $H_{ox}$ ,  $H_{red}$ ,  $H_{ox-DT_i}$  and  $H_{red-DT_i}$  states (out of a total of 1) with the applied potential at pH 7.5 (**A**), 6.5 (**B**) and 5.5 (**C**) are shown based on equations derived using the model shown in **D**.  $H_{ox}$  and  $H_{red}$  are connected by a one electron reduction with a redox potential ( $E_1$ ) of -350 mV,  $H_{ox-DT_i}$  and  $H_{red-DT_i}$  are connected by a one electron reduction with a redox potential ( $E_2$ ) of -290 mV,  $H_{ox}$  and  $H_{ox-DT_i}$  are connected by  $SO_2$  binding with a dissociation constant ( $K_d^{ox}$ ) of 500 nM, and  $H_{red}$  and  $H_{red-DT_i}$  are connected by  $SO_2$  binding with a dissociation constant ( $K_d^{red}$ ) of 60 nM (this work). The  $SO_2$  concentration was calculated using the pH-dependent speciation of  $Na_2SO_3$  based on a  $pK_a$  value for  $SO_3^{2-} + H^+ \rightleftharpoons HSO_3^-$  of 7.19 and equilibrium constant for  $HSO_3^- + H^+ \rightleftharpoons SO_2 + H_2O$  of 1.79,<sup>23</sup> setting the total concentration of  $[Na_2SO_3] = [SO_3^{2-}] + [HSO_3^-] + [SO_2] = 10 \text{ mM}$  (in Senger *et al.*<sup>10</sup>, 10 mM NaDT was present in the assay). The dotted lines indicate the midpoint potentials of the titration curves (i.e. the position where each state is at 50% of its maximum population) at each pH value.

## Supplementary References

1. Kuchenreuther, J. M.; Grady-Smith, C. S.; Bingham, A. S.; George, S. J.; Cramer, S. P.; Swartz, J. R., High-yield expression of heterologous [FeFe] hydrogenases in *Escherichia coli*. *PLoS One* **2010**, *5* (11), e15491.
2. Esselborn, J.; Lambertz, C.; Adamska-Venkatesh, A.; Simmons, T.; Berggren, G.; Noth, J.; Siebel, J.; Hemschemeier, A.; Artero, V.; Reijerse, E.; Fontecave, M.; Lubitz, W.; Happe, T., Spontaneous activation of [FeFe]-hydrogenases by an inorganic [2Fe] active site mimic. *Nat. Chem. Biol.* **2013**, *9* (10), 607-609.
3. Birrell, J. A.; Wrede, K.; Pawlak, K.; Rodriguez-Maciá, P.; Rüdiger, O.; Reijerse, E. J.; Lubitz, W., Artificial Maturation of the Highly Active Heterodimeric [FeFe] Hydrogenase from *Desulfovibrio desulfuricans* ATCC 7757. *Isr. J. Chem.* **2016**, *56* (9-10), 852-863.
4. Le Cloirec, A.; C. Davies, S.; J. Evans, D.; L. Hughes, D.; J. Pickett, C.; P. Best, S.; Borg, S., A di-iron dithiolate possessing structural elements of the carbonyl/cyanide sub-site of the H-centre of Fe-only hydrogenase. *Chem. Commun.* **1999**, (22), 2285-2286.
5. Li, H.; Rauchfuss, T. B., Iron carbonyl sulfides, formaldehyde, and amines condense to give the proposed azadithiolate cofactor of the Fe-only hydrogenases. *J. Am. Chem. Soc.* **2002**, *124* (5), 726-727.
6. Fourmond, V., QSoas: a versatile software for data analysis. *Anal. Chem.* **2016**, *88* (10), 5050-5052.
7. Wille, H. C.; Franz, H.; Röhlberger, R.; Caliebe, W. A.; Dill, F. U., Nuclear resonant scattering at PETRA III : Brilliant opportunities for nano – and extreme condition science. *J. Phys. Conf. Ser.* **2010**, *217*.
8. Rodríguez-Maciá, P.; Birrell, J. A.; Lubitz, W.; Rüdiger, O., Electrochemical investigations on the inactivation of the [FeFe] hydrogenase from *Desulfovibrio desulfuricans* by O<sub>2</sub> or light under hydrogen-producing conditions. *ChemPlusChem* **2017**, *82* (4), 540-545.
9. Rodríguez-Maciá, P.; Dutta, A.; Lubitz, W.; Shaw, W. J.; Rüdiger, O., Direct comparison of the performance of a bio-inspired synthetic nickel catalyst and a [NiFe]-hydrogenase, both covalently attached to electrodes. *Angew. Chem. Int. Ed.* **2015**, *54* (42), 12303-12307.
10. Senger, M.; Laun, K.; Wittkamp, F.; Duan, J.; Haumann, M.; Happe, T.; Winkler, M.; Apfel, U. P.; Stripp, S. T., Proton-coupled reduction of the catalytic [4Fe-4S] cluster in [FeFe]-hydrogenases. *Angew. Chem. Int. Ed.* **2017**, *56* (52), 16503-16506.
11. Senger, M.; Mebs, S.; Duan, J.; Shulenina, O.; Laun, K.; Kertess, L.; Wittkamp, F.; Apfel, U. P.; Happe, T.; Winkler, M.; Haumann, M.; Stripp, S. T., Protonation/reduction dynamics at the [4Fe-4S] cluster of the hydrogen-forming cofactor in [FeFe]-hydrogenases. *Phys. Chem. Chem. Phys.* **2018**, *20* (5), 3128-3140.
12. Winkler, M.; Senger, M.; Duan, J.; Esselborn, J.; Wittkamp, F.; Hofmann, E.; Apfel, U.-P.; Stripp, S. T.; Happe, T., Accumulating the hydride state in the catalytic cycle of [FeFe]-hydrogenases. *Nat. Commun.* **2017**, *8* (1), 16115.
13. Chernev, P.; Lambertz, C.; Brünje, A.; Leidel, N.; Sigfridsson, K. G. V.; Kositzki, R.; Hsieh, C.-H.; Yao, S.; Schiwon, R.; Driess, M.; Limberg, C.; Happe, T.; Haumann, M., Hydride binding to the active site of [FeFe]-hydrogenase. *Inorg. Chem.* **2014**, *53* (22), 12164-12177.
14. Mebs, S.; Duan, J.; Wittkamp, F.; Stripp, S. T.; Happe, T.; Apfel, U.-P.; Winkler, M.; Haumann, M., Differential protonation at the catalytic six-iron cofactor of [FeFe]-hydrogenases revealed by <sup>57</sup>Fe nuclear resonance X-ray scattering and quantum mechanics/molecular mechanics analyses. *Inorg. Chem.* **2019**, *58* (6), 4000-4013.
15. Mebs, S.; Senger, M.; Duan, J.; Wittkamp, F.; Apfel, U.-P.; Happe, T.; Winkler, M.; Stripp, S. T.; Haumann, M., Bridging hydride at reduced H-cluster species in [FeFe]-hydrogenases revealed by infrared spectroscopy, isotope editing, and quantum chemistry. *J. Am. Chem. Soc.* **2017**, *139* (35), 12157-12160.
16. Birrell, J. A.; Pelmeshnikov, V.; Mishra, N.; Wang, H.; Yoda, Y.; Tamasaku, K.; Rauchfuss, T. B.; Cramer, S. P.; Lubitz, W.; DeBeer, S., Spectroscopic and computational evidence that [FeFe]

- hydrogenases operate exclusively with CO-bridged intermediates. *J. Am. Chem. Soc.* **2020**, *142* (1), 222-232.
17. Sanchez, M. L. K.; Sommer, C.; Reijerse, E.; Birrell, J. A.; Lubitz, W.; Dyer, R. B., Investigating the kinetic competency of CrHydA1 [FeFe] hydrogenase intermediate states via time-resolved infrared spectroscopy. *J. Am. Chem. Soc.* **2019**, *141* (40), 16064-16070.
  18. Lorent, C.; Katz, S.; Duan, J.; Kulka, C. J.; Caserta, G.; Teutloff, C.; Yadav, S.; Apfel, U.-P.; Winkler, M.; Happe, T.; Horch, M.; Zebger, I., Shedding light on proton and electron dynamics in [FeFe] hydrogenases. *J. Am. Chem. Soc.* **2020**, *142* (12), 5493-5497.
  19. Rodríguez-Maciá, P.; Breuer, N.; DeBeer, S.; Birrell, J. A., Insight into the redox behavior of the [4Fe-4S] subcluster in [FeFe] hydrogenases. *ACS Catal.* **2020**, *10* (21), 13084-13095.
  20. Haumann, M.; Stripp, S. T., The molecular proceedings of biological hydrogen turnover. *Acc. Chem. Res.* **2018**, *51* (8), 1755-1763.
  21. Zhang, Z.; Ewing, G. E., Infrared spectroscopy of SO<sub>2</sub> aqueous solutions. *Spectrochim. Acta A Mol. Biomol. Spectrosc.* **2002**, *58* (10), 2105-2113.
  22. Adamska-Venkatesh, A.; Krawietz, D.; Siebel, J.; Weber, K.; Happe, T.; Reijerse, E.; Lubitz, W., New redox states observed in [FeFe] hydrogenases reveal redox coupling within the H-cluster. *J. Am. Chem. Soc.* **2014**, *136* (32), 11339-11346.
  23. Selwyn, L.; Tse, S., The chemistry of sodium dithionite and its use in conservation. *Stud. Conserv.* **2008**, *53* (sup2), 61-73.
